# 1           **Genome-wide meta-analysis of pneumonia suggests a role for mucin** 2           **biology and provides novel drug repurposing opportunities**

3  
4 William R. Reay<sup>1,2</sup>, Michael P. Geaghan<sup>1,2</sup>, 23andMe Research Team<sup>3†</sup>, Murray J. Cairns<sup>1,2\*</sup>  
5

6 <sup>1</sup>School of Biomedical Sciences and Pharmacy, Faculty of Health and Medicine, The  
7 University of Newcastle, Callaghan, NSW, 2308, Australia

8 <sup>2</sup>Hunter Medical Research Institute, Newcastle, NSW, 2305, Australia

9 <sup>3</sup>23andMe Inc., Sunnyvale, CA, 94086, United States of America  
10

11 †A list of authors and their affiliations appears at the end of the paper  
12

13 \*To whom correspondence should be addressed:

14 Professor Murray Cairns, Medical Sciences Building, University Drive, Callaghan, NSW  
15 2308, Australia

16 Email: [Murray.cairns@newcastle.edu.au](mailto:Murray.cairns@newcastle.edu.au), Phone: +61 02 4921 8670  
17

## 18 **ABSTRACT**

19 Pneumonia remains one of the leading causes of death worldwide, particularly amongst the  
20 elderly and young children. We performed a genome-wide meta-analysis of lifetime  
21 pneumonia diagnosis (N=266,277), that encompassed the largest collection of cases published  
22 to date. Genome-wide significant associations with pneumonia were uncovered for the first  
23 time beyond the major histocompatibility complex region, with three novel loci, including a  
24 signal fine-mapped to a cluster of mucin genes. Moreover, we demonstrated evidence of a  
25 polygenic effect of common and low frequency pneumonia associated variation impacting  
26 several other mucin genes and *O*-glycosylation, further suggesting a role for these processes in  
27 pneumonia pathophysiology. The pneumonia GWAS was then leveraged to identify drug  
28 repurposing opportunities, including evidence that supports the use of lipid modifying agents  
29 in the prevention and treatment of the disorder. We also propose how polygenic risk could be  
30 utilised for precision drug repurposing through pneumonia risk scores constructed using  
31 variants mapped to pathways with known drug targets. In summary, we provide novel insights  
32 into the genetic architecture of pneumonia susceptibility, with future study warranted to  
33 functionally interrogate novel association signals and evaluate the suitability of the compounds

34 **NOTE: This preprint reports new research that has not been certified by peer review and should not be used to guide clinical practice.**  
prioritised by this study as repositioning candidates.

35 **INTRODUCTION**

36 Pneumonia is characterised as an acute infection of the lung, with fluid filled alveoli and  
37 resultant restriction of oxygen intake being a key hallmark of its pathophysiology. There are a  
38 number of mechanisms known to cause pneumonia, however, bacterial or viral infection are  
39 the most common aetiologies<sup>1</sup>. Pharmacological intervention in pneumonia treatment is largely  
40 dependent on the infection source – for instance, bacterial induced pneumonia is treated with  
41 antibiotics. Yearly mortality rates worldwide from pneumonia remain high, even in the  
42 developed world where access to antibiotics and routine hospital care is usually unrestricted<sup>2,3</sup>.  
43 This necessitates a greater understanding of the mechanisms involved in pneumonia  
44 susceptibility and pathogenesis, which could be leveraged to identify novel treatments and  
45 inform the repositioning of existing drugs.

46

47 There has been considerable work undertaken to identify host factors which influence the onset  
48 and clinical course of pneumonia. Twin-based estimates of pneumonia heritability are still  
49 lacking, however, the heritability of death due to infectious disease has been estimated as high  
50 as 40%, although further study is required<sup>4</sup>. There have also been few studies which have used  
51 modern statistical genetics approaches to test for the existence of risk-increasing or protective  
52 alleles associated with pneumonia with sufficient power for surpassing genome-wide  
53 significance. Previously, a genome-wide association study of lifetime self-reported pneumonia  
54 diagnosis was published using participants obtained by 23andMe Inc. that identified a  
55 significant signal in the major histocompatibility complex (MHC) region on chromosome six<sup>5</sup>.  
56 We sought to increase statistical power to detect association signals by performing a genome-  
57 wide meta-analysis of self-reported pneumonia in the 23andMe cohort with SNP effects on a  
58 clinically ascertained pneumonia phenotype from the FinnGen consortium. The genetic  
59 architecture of pneumonia was further interrogated to identify novel risk genes and salient  
60 biological pathways, along with an estimate of genetic correlation with clinically significant  
61 phenotypes. These data were then considered in light of drug repurposing and provided support  
62 to a number of plausible repositioning opportunities.

63

64

65

66

67

68

## 69 MATERIALS AND METHODS

70

### 71 Genome-wide meta-analysis of pneumonia

72 The genome-wide meta-analysis was performed using two primary study cohorts from  
73 23andMe Inc. and FinnGen (release 3), respectively, with full details of these cohorts and the  
74 meta-analysis procedure detailed in the supplementary methods. Summary statistics for a self-  
75 reported pneumonia phenotype were obtained from 23andMe as outlined by Tian *et al.*<sup>5</sup>. This  
76 self-reported phenotype was derived from an online survey of 23andMe customers about their  
77 medical history. In the final GWAS after quality control (QC), there were 40600 cases and  
78 90039 controls. In addition, summary statistics for pneumonia were downloaded from the third  
79 release of the FinnGen database which combines genotype data from Finnish biobanks and  
80 digital health record data from Finnish health registries. The pneumonia phenotype chosen was  
81 *All pneumoniae* (J10 pneumonia), for which 15771 cases and 119867 controls were available  
82 for GWAS after QC.

83

84 The 23andMe and FinnGen summary statistics were meta-analysed using an inverse-variance  
85 weighted model with fixed effects as implemented by METAL version March 2011<sup>6</sup>. Firstly,  
86 we meta-analysed common variants, defined as sites with allele frequency > 1% in both the  
87 23andMe and FinnGen cohorts. Variants were retained if they were available in both summary  
88 statistics and had an imputation quality that exceeded a minimum of 0.3 or a mean of 0.5 for  
89 variants not physically genotyped, resulting in 6888413 sites with an effect size estimate from  
90 the meta-analysis and a total sample size of 266277 individuals. Imputed rare variants available  
91 in both studies were subjected to a stricter filtering threshold for imputation quality such that  
92 only variants with a minimum imputation quality > 0.5 or a mean value > 0.7 were subjected  
93 to meta-analysis, with 834366 low frequency variants considered. In both instances, we further  
94 tested for heterogeneity between the contributing studies using Cochran's *Q* test. Genome-wide  
95 summary statistics from the IVW meta-analysis were processed using the FUMA v1.3.6  
96 (Functional Mapping and Annotation of Genome-Wide Association Studies) platform<sup>7</sup>.  
97 Genome-wide significant variants were characterised using the traditional  $P < 5 \times 10^{-8}$   
98 threshold, whilst suggestive significance was defined using a more lenient threshold of  $P <$   
99  $1 \times 10^{-5}$ . We utilised the default settings for defining independent significant SNPs ( $r^2 \leq 0.6$ )  
100 and lead SNPs ( $r^2 \leq 0.1$ ). The reference panel population for LD estimation was the UK  
101 biobank release 2b 10k White British panel, with LD blocks within 250 kb of each other merged  
102 into a single locus. We examined the effect of conditioning on two smoking GWAS via the

103 multi-trait-based conditional & joint analysis (mtCOJO) framework implemented in GCTA v  
104 1.93.2 beta (Supplementary Methods)<sup>8,9</sup>. For the *MUC5AC* lead SNP, we additionally  
105 performed a phenome-wide association study using the IEUGWAS database version 3.7.0  
106 (<https://gwas.mrcieu.ac.uk/>), reporting SNPs using a conventional phenome-wide significance  
107 threshold of  $P < 1 \times 10^{-5}$ . Given the most significant association in this database was a GWAS  
108 of adult-onset asthma<sup>10</sup>, we tested whether the association of SNPs proximal to *MUC5AC* was  
109 driven by the same underlying causal variant, assuming a single causal variant, via the *coloc*  
110 colocalisation methodology implemented in version 4 of the package<sup>11</sup>. We also sought to  
111 replicate our results in two UK biobank (UKBB) pneumonia GWAS, specifically, a self-  
112 reported pneumonia phenotype performed in the automated GWAS pipeline by the MRC IEU  
113 group (ukb-b-4533, <https://gwas.mrcieu.ac.uk/datasets/ukb-b-4533/>), as well as a phecode  
114 ICD-10 UKBB GWAS performed in an automated series of GWAS by the authors of the  
115 SAIGE methodology (<https://pheweb.org/UKB-SAIGE/pheno/480>)<sup>12</sup>.

116

#### 117 **Estimation of SNP-based heritability**

118 SNP based heritability was computed using LD score regression (LDSR) with 1000 genomes  
119 phase 3 LD scores and weights<sup>13</sup>. We converted the heritability estimate to the liability scale  
120 assuming the population prevalence of pneumonia as that of pneumonia in the FinnGen dataset  
121 (12.61%), as well as a more conservative estimate based on ICD-10 diagnosed pneumonia in  
122 the UK biobank (UKBB) sample (3.20% - Supplementary Methods).

123

#### 124 **Finemapping genome-wide significant loci**

125 We finemapped the three-novel genome-wide significant loci outside of the MHC region by  
126 using a method which leverages asymptotic Bayes' factors (ABF) to estimate credible sets  
127 under the assumption of a single causal variant<sup>14</sup>. Specifically, we utilised Wakefield's method  
128 to approximate ABFs assuming a prior variance of  $0.2^2$ , which reflects the belief that the  
129 confidence intervals of estimated variant effect sizes expressed as odds ratios ranging from  
130 around 0.68 to 1.48. Given that the posterior probability for causality of each variant is  
131 proportional to its Bayes' factor, these can be summed until a prespecified probability ( $\rho$ ) is  
132 reached, thus, constituting a  $\rho$  set of putative causal variants. In this study, we derived 95%  
133 credible sets. A single causal variant was assumed such that we did not have to account for LD  
134 between variants, which has been demonstrated to be problematic in finemapping studies  
135 which prespecify more than one causal variant using references external to the GWAS like the  
136 1000 genomes project panel<sup>15</sup>.

### 137 **Gene-based and gene-set association**

138 Common variant (MAF > 0.01) SNP-wise  $P$  values were aggregated at gene-level using  
139 MAGMA v1.07b<sup>16</sup>, as described in the supplementary methods. The Bonferroni threshold for  
140 genic association was  $P < 2.68 \times 10^{-6}$ , accounting for the number of genes tested. Moreover,  
141 gene-based  $P$  values were leveraged for gene-set association using 1379 hallmark and  
142 canonical gene-sets from the Molecular Signatures Database (MSigDB)<sup>17</sup>. Rare variants (MAF  
143 < 0.01) were also aggregated at gene-level by leveraging the properties of the Cauchy  
144 distribution (Supplementary Methods). Code for the Cauchy combination test was obtained  
145 from (<https://github.com/yaowuliu/ACAT>) and outlined by Liu and Xie<sup>18,19</sup>. The MAGMA  
146 approach for common variants accounts for dependency between  $P$  values by estimating their  
147 covariance as a function of pairwise LD in a population sample – however, there are  
148 methodological challenges with this approach for rare variants and likely much larger samples  
149 would be required for accurate estimation of dependency between rare variants, if any  
150 exists<sup>20,21</sup>. Therefore, we employed Cauchy transformation to combine  $P$  values as it guards  
151 against type I error inflation due to potential unknown covariance between rare variants  
152 (Supplementary Methods). In addition, we constructed a model for rare variant gene-set  
153 association analogous to the MAGMA approach for common variants that leverages gene-  
154 based  $Z$  values (probit transformation of  $P$ ). The same collection of pathways from MSigDB  
155 were considered, with genic  $Z$  values regressed against a binary indicator of set membership  
156 ( $\beta_s$ ), covaried for logarithmically transformed gene-length, and rare variant count per gene. A  
157 one-sided test was performed for  $\beta_s$ , such that the null hypothesis is  $\beta_s = 0$  and the alternative  
158  $\beta_s > 0$ . Only gene-sets with rare variants overlapping at least 5 genes were retained.

159

### 160 **Transcriptome-wide association studies of pneumonia**

161 A transcriptome-wide association study (TWAS) of pneumonia was performed using the  
162 FUSION package<sup>22</sup>. We utilised GTEx v7 SNP weights from three tissues that would be  
163 plausibly involved in the pathophysiology of pneumonia (whole blood, lung, and spleen). We  
164 corrected for the number of *cis*-heritable genes outside the MHC region for which a TWAS  $Z$   
165 could be calculated in each tissue (Supplementary Methods). For transcriptome-wide  
166 significant genes, we tested whether the expression and pneumonia-associated signal displayed  
167 statistical colocalisation as encompassed by the SNP weights with the *coloc* package as  
168 implemented by FUSION<sup>11</sup>. In addition, we probabilistically finemapped transcriptome-wide  
169 significant regions using the FOCUS approach to derive a credible set of putative causal genes,  
170 as described previously<sup>23</sup>. We utilised the default Bernoulli prior ( $p = 1 \times 10^{-3}$ ) and chi-square

171 prior variance ( $n\sigma^2 = 40$ ) to approximate Bayes' factors for each gene, and thus, derive the  
172 posterior inclusion probabilities (*PIP*) for each gene to be causal given its observed TWAS *Z*.

173

174

### 175 **Genetic correlation and causal inference**

176 We estimated genetic correlation between pneumonia and 180 high quality, European ancestry  
177 GWAS using LDSR as implemented by the LDhub application<sup>24</sup>. For Bonferroni significant  
178 genetic correlation estimates, we constructed a latent causal variable (LCV) model using the  
179 most significant trait from each LDhub phenotypic category and pneumonia to evaluate  
180 evidence for genetic causality between traits, as outlined extensively elsewhere<sup>25-27</sup>. A strong  
181 estimate of the posterior genetic causality proportion (GCP) was defined as significantly  
182 different from zero (one sided *t*-test) and an absolute GCP estimate > 0.6. Weak GCP estimates  
183 close to zero for genetically correlated traits imply that their relationship is potentially mediated  
184 by horizontal pleiotropy, whereby there are shared pathways, but the two traits do not likely  
185 exhibit vertical pleiotropy by acting within the same pathway. We additionally evaluated  
186 evidence for a causal relationship between HDL cholesterol and pneumonia by constructing a  
187 multivariable Mendelian randomisation (MR) model using the TwoSampleMR package<sup>28</sup>. This  
188 multivariable model leveraged genetic instrumental variables (IV) from three highly  
189 biologically interconnected lipid traits (LDL, HDL, and triglycerides) and estimated the effects  
190 of these IVs on the outcome conditioned on their association with the other two lipid classes<sup>29</sup>.

191

### 192 **Genetically informed drug repurposing**

193 We implemented three strategies to propose drug repurposing candidates: i) single loci drug-  
194 gene matching, ii) genetic correlation and/or evidence of a putative causal relationship between  
195 a biochemical trait that could be targeted by an approved drug, and iii) precision drug  
196 repurposing using the polygenic scoring orientated *pharmagenic enrichment score* (PES)  
197 approach. Full details of these analyses are described in the supplementary methods. We  
198 utilised a panel of 50 biochemical GWAS performed by the Neale lab from the UK biobank  
199 which had high or medium confidence estimates of SNP heritability that were significantly  
200 different from zero (<http://www.nealelab.is/uk-biobank>) and estimated genetic correlation and  
201 the posterior mean GCP for trait pairs that survived Bonferroni correction. We sought to  
202 replicate the results of the multivariable MR for the three lipid classes (LDL, HDL, and  
203 Triglycerides) using the UK biobank GWAS. MR was then performed to evaluate further  
204 evidence for a causal effect between gamma-glutamyltransferase (GGT) and pneumonia, as

205 well as triglycerides and pneumonia (univariable estimate). Specifically, we defined  
206 independent, non-palindromic genome-wide significant variants as IVs and constructed four  
207 MR models with differing underlying assumptions (two inverse-variance weighted estimators  
208 with fixed or multiplicative random effects, weighted median estimator, weighted mode  
209 estimator, and MR-Egger)<sup>30-33</sup>. A series of sensitivity analyses to evaluate statistical evidence  
210 for confounding pleiotropy was then undertaken as outlined in the supplementary methods<sup>32-</sup>  
211 <sup>35</sup>.

212  
213 The PES framework is based on the postulation that an enrichment of genetic risk within a  
214 biological pathway with known drug targets may be an impetus to repurpose a drug which  
215 modulates that pathway for individuals who carry the high genetic load mapped to the pathway,  
216 as described elsewhere<sup>36,37</sup>. Specifically, we identify druggable pathways with an enrichment  
217 of common variant associations relative to the rest of the genes tested and construct pathway-  
218 based risk scores for these gene-sets (Supplementary Methods). We utilised the UK biobank  
219 (UKBB) cohort to test the association between a pneumonia PES and pneumonia phenotypes  
220 recorded for these participants<sup>38,39</sup>. These analyses are described in detail in the supplementary  
221 methods. Briefly, we retained 336,896 unrelated white British ancestry participants and  
222 13,568,914 autosomal variants that survived a series quality control steps, including,  
223 imputation quality filtering (INFO > 0.8), MAF > 1 x 10<sup>-4</sup>, call rate > 0.98, and filtering strong  
224 deviations from the Hardy-Weinberg equilibrium. Self-reported pneumonia diagnosis and  
225 ICD-10 codes from hospital inpatient records were used to construct the pneumonia phenotype  
226 (Supplementary Methods). There were 10,540 individuals from the genotyped subset of the  
227 cohort included in the PES calculation with a primary or secondary diagnosis using the ICD-  
228 10 primary or secondary diagnosis codes relevant to pneumonia. In the strict phenotype  
229 definition, we defined cases as those satisfying ICD-10 criteria, and controls as all those who  
230 did not have one of those codes recorded along with any individual who self-reported  
231 pneumonia without a pneumonia ICD-10 code (N<sub>Controls</sub> = 320,213). Individuals who self-  
232 reported pneumonia but were not assigned a relevant ICD-10 code were excluded from the  
233 study cohort in this strict configuration. In the broad-phenotype definition, pneumonia cases  
234 were individuals with a relevant ICD-10 code or a self-reported lifetime pneumonia diagnosis  
235 (N = 15,138). In other words, the strict definition only included individuals with a pneumonia  
236 ICD-10 code. The PES was then constructed using common, autosomal variants outside of the  
237 MHC region mapped to genes in that pathway with PRsice2 assuming an additive model, with  
238 further details provided in the supplementary methods<sup>40</sup>. The *P* value threshold of including

239 variants in the PES was the same as what was used to identify the gene-set. A genome wide  
240 PRS for pneumonia susceptibility was also constructed in an analogous fashion.

241

242 We explored the phenotypic relevance of pneumonia PES profiles using a random subset of  
243 the UKBB (N ~ 10,000) for which a multiplex assay was performed to quantify  
244 immunoglobulin G (IgG) antibody response to a series of antigens for infectious agents  
245 selected for study, as outlined elsewhere<sup>41</sup>. The two phenotypes of interest here were a binary  
246 indicator of *seropositivity* for 14 infections with seroprevalence > 5% in our genotyped subset  
247 of the cohort, and amongst seropositive individuals, a continuous measure of antibody response  
248 (mean fluorescence intensity) to each antigen for that infection – termed *seroreactivity*. The  
249 correlation between PES or PRS and seroreactivity was assessed by linear regression, whilst  
250 logistic regression was utilised for seropositivity. Both models were covaried for sex, age, age<sup>2</sup>,  
251 ten SNP derived principal components, genotyping batch, and two QC metrics related to the  
252 antibody assay (Supplementary Methods). A heatmap of the regression *t* statistics was  
253 constructed using the ComplexHeatmap package<sup>42</sup>

254

## 255 RESULTS

256

### 257 Novel common and rare variant loci associated with pneumonia

258 We performed a genome-wide meta-analysis of pneumonia using common and rare (MAF <  
259 0.01) overlapping variants from 23andMe and FinnGen release three, with 6,888,413 and  
260 834,366 common and low frequency sites tested, respectively. We estimated the SNP based  
261 heritability as approximately 3.24% on the liability scale (Fig. 1b), using the incidence of  
262 pneumonia in the FinnGen cohorts as the population prevalence (12.67%), although we  
263 acknowledge the population prevalence of pneumonia is difficult to quantify. As a result, we  
264 re-estimated  $h^2$  using a more conservative population prevalence value based on phenotype  
265 data from the UK biobank (3.20%), resulting in a lower estimate of  $h^2_{\text{SNP}} = 0.0213$ . The point  
266 estimate of SNP-based  $h^2$  was higher in the 23andMe cohort.  $h^2_{\text{SNP}} = 0.054$ , although the  
267 estimate was more precise in the meta-analysis than in 23andMe and FinnGen alone:  $Z_{\text{Meta}} =$   
268 9.26,  $Z_{23\text{andMe}} = 7.44$ , and  $Z_{\text{FinnGen}} = 4.12$ . In line with previous comparisons between self-  
269 reported and clinically ascertained phenotypes, the heritability estimate was lower in FinnGen  
270 than 23andMe. There was some evidence of test statistic inflation when visualised as a *QQ* plot  
271 (Supplementary Figure 1), however, the proportion of the polygenic signal in the meta-analysis



272 attributed to model misspecification and/or confounding was around 11% (LDSR ratio =  
273 0.1145), whilst the mean  $\chi^2$  was large enough to estimate heritability (1.11).

274

275 There were four common genomic loci that surpassed the conventional genome-wide  
276 significance threshold ( $P < 5 \times 10^{-8}$ , Table 1, Fig. 1a,c, Supplementary Fig. 2-5). The effect  
277 sizes of these common variant signals were small in accordance with expectation, with each  
278 SNP increasing or decreasing the odds of pneumonia by around 5%. Unsurprisingly, the most  
279 significant signal spanned the major histocompatibility complex (MHC) region, which has  
280 been previously published as associated with pneumonia in the 23andMe cohort<sup>5</sup>. Due to the  
281 complexity of this region, we define the MHC signal as a single locus, with the minor allele of  
282 the lead common SNP associated with a small reduction in the odds of pneumonia (OR = 0.94  
283 [95% CI: 0.92, 0.96],  $P = 6.44 \times 10^{-13}$ ). The most significant novel common signal in this study  
284 was a region located on chromosome 11, with the lead SNP (rs28624253) located upstream of  
285 the *MUC5AC* gene that encodes a mucin protein, with three other genes that encode a mucin  
286 protein within 400 kilobases of the lead SNP *MUC6*, *MUC2*, and *MUC5B*. Importantly,  
287 rs28624253 was similarly associated in the 23andMe ( $P = 2.65 \times 10^{-6}$ ) and FinnGen ( $P = 3.42$   
288  $\times 10^{-6}$ ) cohorts and there was no appreciable evidence for differences in population structure  
289 between the input GWAS driving this signal. Mucins are heavily glycosylated proteins that  
290 play a number of important roles, particularly in relation to the maintenance of mucosal  
291 barriers<sup>43</sup>. Mucin genes are known to exhibit somewhat pervasive genomic complexity and  
292 evidence of heterogeneity between populations, to ensure that this signal is not just an artefact  
293 of this, we performed a phenome-wide association study of the lead SNP and found that this  
294 variant was associated with only relevant phenotypes to pneumonia. Specifically, it was linked  
295 to adult-onset asthma, self-reported regular cough and mucus, and eosinophil count at a  
296 conventional phenome-wide significance threshold ( $P < 1 \times 10^{-5}$ ). Given rs28624253 was  
297 associated with adult-onset asthma at a more stringent level of genome-wide significance, we  
298 tested whether the mucin signal observed for pneumonia and adult-onset asthma were driven  
299 by the same underlying causal variant and found strong evidence to support this hypothesis  
300 (posterior probability > 90%). We caution that this assumes the existence of a single causal  
301 variant, which may be unrealistic given the complexity of this region. As we visualise in  
302 supplementary figure 6, if one utilises a more conservative prior probability of a shared causal  
303 variant than there is some evidence that there is a different underlying causal variant but that  
304 the locus is still associated with both traits. It should also be noted that the odds increasing  
305 allele for pneumonia (*G*) is perhaps counterintuitively associated with decreased risk of asthma,

306 which suggests a multifaceted biological mechanism which may be related to the role of mucins  
307 in the airway.

308

309 The third most significant locus encompassed several genes including *SAMD8*, *DUSP13*, and  
310 *VDAC2*, whilst locus four was largely intergenic, with some variants overlapping long-  
311 noncoding RNAs with limited annotation information (Supplementary Text). There were also  
312 two loci that almost surpassed genome-wide significance; specifically, a locus physically  
313 mapped to the interleukin-6 receptor region (*IL6R* – lead SNP: rs12730036,  $P = 5.61 \times 10^{-8}$ ),  
314 and a region on chromosome 12 where the lead SNP is mapped to an intron of *TNFRSF1A*,  
315 which encodes a tumour necrosis factor receptor (lead SNP: rs1800693,  $P = 5.5 \times 10^{-8}$ ). We  
316 integrated functional genomic and annotation data to prioritise candidate genes from the novel  
317 genome-wide significant loci in this study, as described in the supplementary text. We found  
318 that genes in the non-MHC loci implicated by at least two lines of evidence were enriched in  
319 phenotypically relevant pathways such as mucus layer, lung fibrosis, and *O*-linked  
320 glycosylation of mucins (Supplementary Figure 5, Supplementary Text). Interestingly, despite  
321 the meta-analysis combining a self-reported phenotype with clinically ascertained pneumonia  
322 diagnoses, only the lead SNP in the MHC locus demonstrated any significant heterogeneity in  
323 the effect sizes between the two cohorts (Cochran's  $Q$ ,  $P_{\text{Het}} = 0.04$ , Table 1, Supplementary  
324 Text, Supplementary Figure 7).

325

326

327

328

329

330

331

332

333

334

335

336

337

338

339

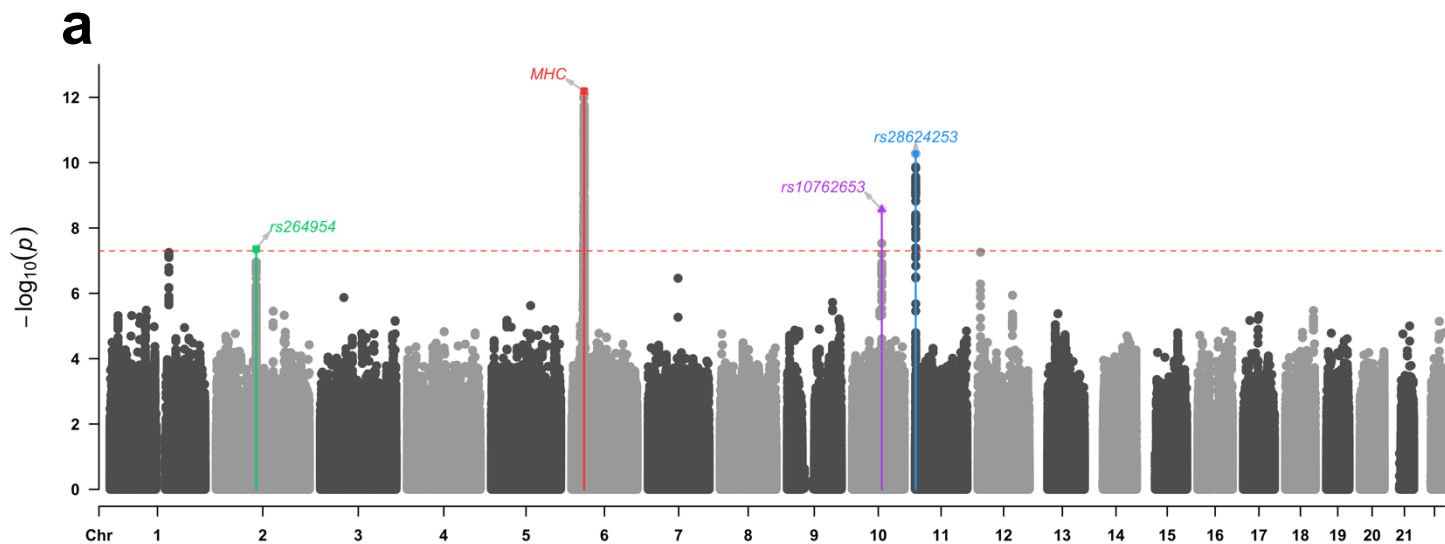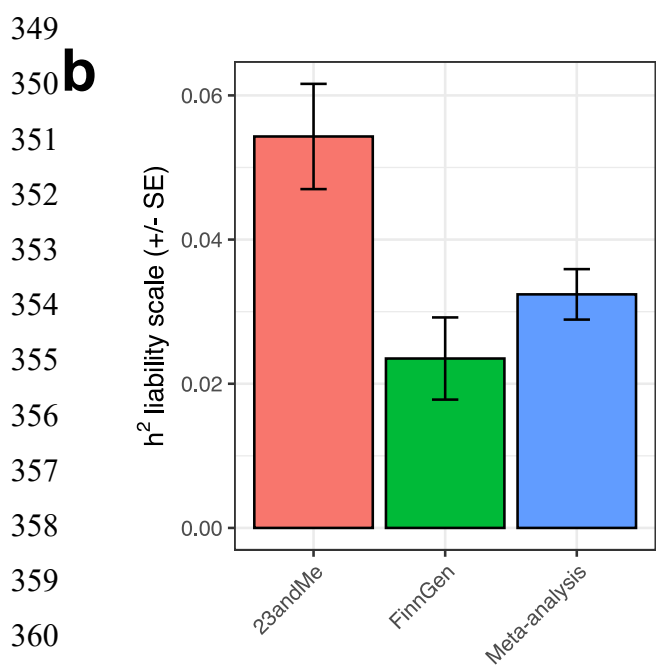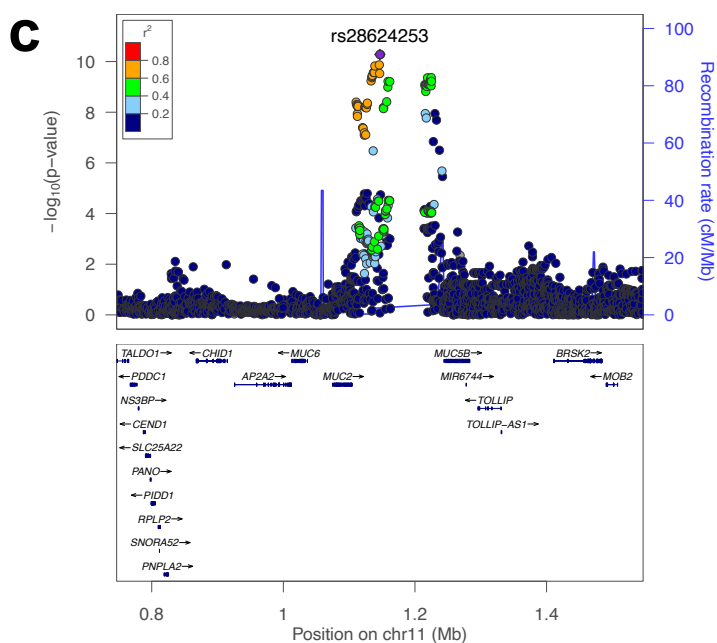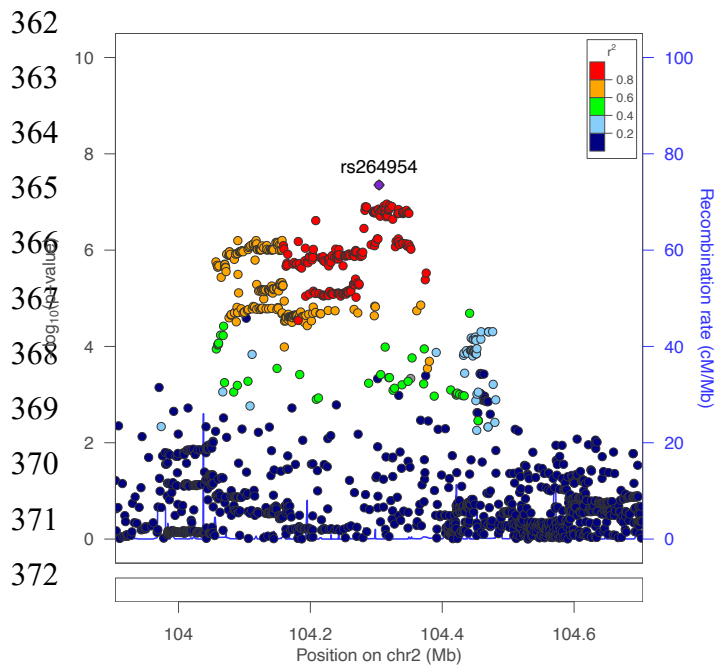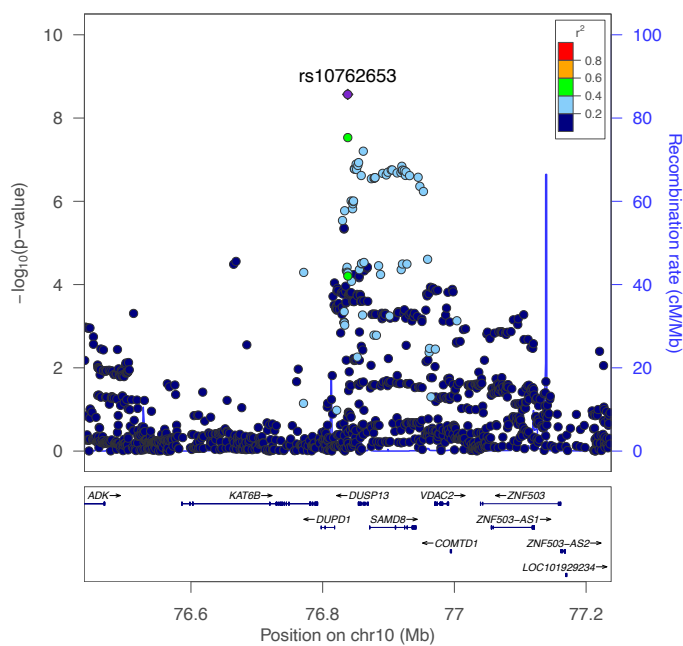

373 **Figure 1. Genome-wide meta-analysis of pneumonia susceptibility.** (a) Manhattan  
 374 plot of common variant GWAS for pneumonia, as is usual practice, each point is the -  
 375  $\log_{10} P$  value of a variant for association with pneumonia, with the red dotted line  
 376 indicative of genome-wide significance ( $P < 5 \times 10^{-8}$ ). Lead SNPs are highlighted and  
 377 labelled on the plot, except for the MHC locus which we denote as “MHC” due to its  
 378 complexity. (b) Estimates of SNP-based heritability ( $h^2$ ) on the liability scale for the  
 379 23andMe and FinnGen cohorts individually, as well as the using the inverse-variance  
 380 weighted effects meta-analysis of the two cohorts. The error bars represent the standard  
 381 error of  $h^2$ . (c) Region plots for the three-novel genome-wide significant loci outside of  
 382 the MHC region, the LD for each variant with the lead SNP estimates from the 1000  
 383 genomes phase III European reference set was utilised to colour the points.

384

385 **Table one: Lead SNPs within common genome-wide significant loci associated with**  
 386 **pneumonia**

| Lead SNP   | Locus                        | EA/NEA | EAF<br>(NFE) | EAF<br>(FIN) | OR   | 95%<br>CI     | $P_{\text{GWAS}}$ | $P_{\text{Het}}$ |
|------------|------------------------------|--------|--------------|--------------|------|---------------|-------------------|------------------|
| rs9268966  | MHC                          | G/A    | 0.26         | 0.33         | 0.94 | 0.92,<br>0.96 | $6.44e^{-13}$     | 0.04             |
| rs28624253 | chr11:1110395-<br>1232702    | G/A    | 0.37         | 0.41         | 1.05 | 1.04,<br>1.07 | $5.27e^{-11}$     | 0.44             |
| rs10762653 | chr10:76815686-<br>76993015  | G/A    | 0.16         | 0.18         | 1.06 | 1.04,<br>1.08 | $2.70e^{-9}$      | 0.61             |
| rs264954   | chr2:104056454-<br>104380545 | T/C    | 0.46         | 0.45         | 0.96 | 0.95,<br>0.98 | $4.44e^{-8}$      | 0.53             |

387 Common (MAF > 0.01) lead SNPs were defined as independent SNPs ( $r^2 < 0.1$ ) within each genomic locus.

388 The effect allele (EA) and non-effect allele (NEA) was reported for this table such that the effect allele was the

389 minor allele. The effect allele frequency (EAF) is denoted in gnomAD v2.1.1 for non-Finish Europeans (NFE)

390 and Finns (FIN). All odds ratio and their respective confidence intervals were calculated relative to the EA.

391 Heterogeneity of effect between the 23andMe and FinnGen cohorts was tested using Cochran’s  $Q$ , with the  $P$

392 value of that test reported here ( $P_{\text{Het}}$ ). Due to the complexity of locus 1 (MHC), we report only a single common

393 SNP for this locus. Locus coordinates in in hg19 assembly.

394

395 The novel genome-wide significant loci outside the MHC region were finemapped to estimate

396 a 95% credible set of plausible causal variants assuming a single causal variant in each region

397 (Supplementary Tables 1-3). The variants encompassed by the 95% credible set for the

398 rs28624253 locus were all proximally upstream/downstream of *MUC5AC*, or within the gene  
399 itself, supporting the relevance of this mucin gene for that association signal. The second most  
400 significant novel pneumonia associated locus discovered in this study (rs10762653 lead SNP)  
401 had a smaller credible set, with the lead SNP having a considerably high posterior probability  
402 than the remaining credible set SNPs ( $PP = 0.676$ ). Interestingly, the lead SNP for this locus  
403 has low estimated LD with other proximal genome-wide significant SNPs (Fig 1c), suggesting  
404 the existence of several causal variants that cannot be accounted for by this method. Finally,  
405 the intergenic region spanned by the third novel genome-wide significant locus yielded a large  
406 credible set of over 200 variants and, as a result, further functional interrogation is required to  
407 mechanistically interpret this locus.

408  
409 Smoking status was not included as a covariate in the respective GWAS meta-analysed, and  
410 thus, we sought to investigate whether genetic variants associated with smoking may confound  
411 our findings in this GWAS. Specifically, we genetically conditioned common variant  
412 associations on their effect size from a GWAS of smoking initiation and smoking heaviness  
413 using mtCOJO<sup>8</sup>. The effect sizes of the lead SNPs from the novel genome-wide significant loci  
414 were not greatly attenuated after conditioning on either of the smoking phenotypes and  
415 remained genome wide significant, with the exception of the locus tagged by rs264954  
416 (Conditioned on smoking initiation:  $P = 7.15 \times 10^{-7}$ ; Conditioned on smoking heaviness:  $P =$   
417  $1.05 \times 10^{-7}$ ). Furthermore, there was a slight reduction in the SNP heritability estimate on the  
418 liability scale, although this only amounted to a less than 0.5% difference after conditioning on  
419 either smoking phenotype –  $h^2_{\text{Conditioned on smoking initiation}} = 3.08\%$ ,  $h^2_{\text{Conditioned on smoking heaviness}} =$   
420  $2.95\%$ .

421  
422 We also uncovered a genome-wide significant association between a rare intergenic variant in  
423 the MHC region and pneumonia - rs11962863, OR = 1.59 [95% CI: 1.44, 1.74],  $P = 1.15 \times 10^{-}$   
424 <sup>9</sup>. This relatively large effect allele, however, did display statistically significant heterogeneity  
425 in its effect between the two cohorts ( $P = 8.20 \times 10^{-5}$ ). This locus is considerably rarer in the  
426 Finnish population (AF =  $5.8 \times 10^{-4}$ ) than non-Finnish Europeans in gnomAD (AF =  $2.9 \times 10^{-}$   
427 <sup>3</sup>), which may account for its larger effect size in the FinnGen cohort. Due to the complexity  
428 of recombination and linkage in the MHC locus, the functional consequences of this variant  
429 remains difficult to interpret at an individual level without considering the local genomic  
430 context of affected individuals, such as HLA type. We also detected six additional regions with

431 rare variants that surpassed suggestive significance for association with pneumonia ( $P < 1 \times$   
432  $10^{-5}$ , Supplementary Table 4).

433

434 We sought to replicate our genome-wide significant and suggestively associated common loci  
435 using two GWAS from the independent UK Biobank cohort – specifically, we utilised two  
436 automated GWAS that encompassed a self-reported pneumonia phenotype ( $N_{\text{Case}} = 6572$ ,  
437  $N_{\text{Controls}} = 456,361$ ) and ICD-10 derived pneumonia diagnoses ( $N_{\text{Case}} = 10,059$ ,  $N_{\text{Controls}} =$   
438  $398,538$ ). We investigated both phenotyping approaches given our GWAS was a meta-analysis  
439 of self-reported and clinically ascertained data. In the self-reported pneumonia UKBB GWAS,  
440 we found that no SNPs replicated at genome-wide significance, however, the *MUC5AC* lead  
441 SNP was nominally associated in the same direction ( $\beta = 0.001$ ,  $SE = 2.6 \times 10^{-3}$ ,  $P = 0.022$ ),  
442 with the MHC lead SNP also was also nominally significant ( $P = 0.03$ ) and the remaining two  
443 lead SNPs demonstrated no significant evidence of replication. The ICD-10 phenotype GWAS  
444 in the UKBB did not replicate any of our non-MHC genome-wide significant SNPs at even  
445 nominal significance, although MHC SNPs were found to be nominally significant. It should  
446 be noted that a limitation of both GWAS is that they focused only on either the self-reported  
447 or clinically ascertained phenotype in the UKBB, meaning some controls plausibly would have  
448 had pneumonia, and thus, decreasing power. Moreover, the effective sample sizes ( $N_{\text{eff}}$ ) of  
449 these UKBB GWAS were markedly smaller than ours (177749 in the current discovery meta-  
450 analysis versus 25915 and 39246, respectively).

451

452 We also considered two very recent smaller sample-size pneumonia GWAS without publicly  
453 available summary statistics to see if we could replicate their findings. Firstly, Chen *et al.*  
454 performed a GWAS of pneumonia susceptibility and severity in the Vanderbilt University  
455 Biobank (BioVU,  $N_{\text{Case}} = 8889$ ,  $N_{\text{Controls}} = 60,767$ ,  $N_{\text{eff}} = 31019$ ), European ancestry cohort)<sup>44</sup>.  
456 They found that a genome-wide significant common signal in Europeans associated with  
457 pneumonia severity, with the lead SNP rs10786398 nominally associated in our meta-analysis:  
458  $\beta = -0.029$ ,  $SE = 0.001$ ,  $P = 2.5 \times 10^{-4}$ , whilst we were unable to replicate the significant rare-  
459 variant association signal from that study as the variant was not available in our analyses.  
460 Moreover, a meta-analysis of a smaller previous FinnGen release and ICD-10 ( $N_{\text{eff}} = 94584$ )  
461 derived pneumonia in the UKBB found two genome-wide significant index SNPs in the  
462 15q15.1 region that were directionally consistent in our analyses, although not statistically  
463 significant, with a trend observed for rs76474922:  $\beta = 0.025$ ,  $SE = 0.01$ ,  $P = 0.08$ <sup>45</sup>. The SNP-

464 based heritability estimate from that study also closely mirrored ours (3.3% on the liability  
465 scale), supporting the reliability of this study's estimate in a larger sample.

466

#### 467 **Gene and gene-set association further supports a role for mucin biology in pneumonia**

468 We performed gene and gene-set association to investigate associations with pneumonia  
469 beyond univariable SNP-phenotype relationships (Supplementary Tables 5,6). Six genes  
470 outside of the MHC region were significant in the meta-analysis after the application of  
471 multiple-testing correction (*MUC5AC*, *MUC5B*, *DUPD1*, *SAMD8*, *DUSP13*, and *TOX*), all of  
472 which were within genome-wide significant loci except for the *TOX* gene ( $P = 1.26 \times 10^{-6}$ ),  
473 which plays a role in T cell persistence during response to a pathogen<sup>46,47</sup>. Gene-set association  
474 revealed a single gene-set for which its member genes were enriched with pneumonia  
475 associated common variation relative to all other genes tested: *Termination of O-glycan*  
476 *biosynthesis* -  $\beta = 0.89$ ,  $SE = 0.21$ ,  $P = 1.05 \times 10^{-5}$ ,  $q = 0.01$ . The strongest gene-based signal  
477 in this pathway was accounted for by two mucin genes that span part of the genome-wide  
478 significant loci on chromosome 11 (*MUC5AC*, *MUC2*), whilst there were four other mucin  
479 genes within this set that displayed a nominal gene-based association ( $P < 0.05$ ) outside that  
480 region (*MUC15*, *MUC16*, *MUC12*, and *MUC17*). The signal from this gene-set remained  
481 relatively robust upon using a more conservative definition of the genic boundaries for SNP to  
482 gene annotation during gene-based association:  $\beta = 0.66$ ,  $SE = 0.19$ ,  $P = 3.04 \times 10^{-4}$ . Rare  
483 variants were then subjected to gene-based association by leveraging the properties of the  
484 Cauchy distribution, such that covariance between  $P$  values did not need to be estimated. No  
485 genes surpassed Bonferroni correction, considering genes with at least two rare variants. The  
486 most significant gene found upon testing all genic rare variants was *ZNF19*,  $P = 6.3 \times 10^{-5}$ ,  
487 whilst *FREMI* was the top gene ( $P = 8.16 \times 10^{-4}$ ) considering variants annotated as exonic only  
488 (Supplementary Tables 7,8). Furthermore, we utilised the gene-based results to construct a  
489 competitive rare variant gene-set association model and tested the same gene-sets as in the  
490 common variant analyses (Supplementary Tables 9,10). While there were no gene-sets that  
491 survived multiple-testing correction utilising all genic rare variants or those with only exonic  
492 annotated sites, we found some support for B lymphocyte antigen response in the rare variant  
493 architecture of pneumonia, as the most significant association from the rare variant model was  
494 with the *B cell antigen receptor* pathway -  $\beta = 0.59$ ,  $SE = 0.19$ ,  $P = 7.7 \times 10^{-4}$ . Interestingly,  
495 there was also a nominal rare variant signal amongst pathways related to carbohydrate  
496 metabolism (*Metabolism of carbohydrates* -  $P = 6.22 \times 10^{-3}$ , *Glycosaminoglycan degradation*

497 –  $P = 0.02$ ) and glycosylation (*N-glycan biosynthesis* –  $P = 0.01$ ), although these results must  
498 be interpreted cautiously given, they do not survive multiple testing correction.

499

500 A transcriptome-wide association study was then undertaken to identify genes for which  
501 genetically predicted expression was correlated with pneumonia susceptibility. We selected  
502 SNP weights from three tissues which are plausibly biologically relevant to pneumonia  
503 pathophysiology: lung, whole blood, and spleen. After applying Bonferroni correction to the  
504 number of tests within each tissue outside the MHC individually, significant correlation was  
505 observed between decreased predicted expression of *VDAC2* and pneumonia ( $Z = -4.39$ ,  $P =$   
506  $1.15 \times 10^{-5}$ , Supplementary Table 11) using spleen tissue as the prediction model. The  
507 association between *VDAC2* and pneumonia was also supported by SNP weights from the lung  
508 and whole blood, although these did not surpass the Bonferroni threshold:  $P_{\text{Lung}} = 5.52 \times 10^{-4}$ ,  
509  $P_{\text{Whole blood}} = 9.97 \times 10^{-4}$ . We tested a related, but distinct hypothesis by assessing evidence for  
510 colocalisation between the GWAS signal spanning *VDAC2* and the SNP weights from the three  
511 tissues utilised to construct the model of genetically predicted *VDAC2* expression.  
512 Colocalisation assumes a biologically conservative parameter of a single shared causal variant  
513 that underlies the relationship between *VDAC2* expression and pneumonia. We observed  
514 heterogeneity between the three tissues, with moderately strong evidence of colocalisation  
515 between *VDAC2* expression and SNP weights from whole blood ( $PP_{H4} = 0.848$ ), however,  
516 using lung and spleen expression SNP weights there was no strong evidence ( $PP > 0.8$ ) for any  
517 of the five colocalisation hypotheses. In lung, there was evidence for an association between  
518 *VDAC2* lung expression SNP weights and pneumonia ( $PP_{H3} = 0.568$ ,  $PP_{H4} = 0.363$ ), although  
519 we were not able to clearly determine whether there were two independent SNPs driving the  
520 association (H3) or a shared variant (H4). Interestingly, there was moderate support in the  
521 model leveraging the spleen SNP expression weights that this signal was only associated with  
522 pneumonia and not *VDAC2* expression ( $PP_{H2} = 0.643$ ), which could be driven by the spleen  
523 model of genetically regulated expression being somewhat less predictive ( $R^2 = 0.038$ , best  
524 linear unbiased prediction), than in blood ( $R^2 = 0.1$ , LASSO) and lung ( $R^2 = 0.083$ , elastic net),  
525 respectively. Probabilistic finemapping of the marginal TWAS  $Z$  scores in the *VDAC2* region  
526 was then undertaken using a multi-tissue panel to assess evidence for whether *VDAC2* is the  
527 causal gene in this region. This locus was dense with genes, with 26 unique genes within the  
528 90% credible set of causal genes. There was moderate evidence that *VDAC2* was the most  
529 probable causal gene at this locus given it had the largest absolute TWAS  $Z$ , the highest  $PIP$   
530 for an individual model from the adrenal gland ( $PIP = 0.279$ ), and a relatively large cumulative



531 *PIP* for all 17 *VDAC2* models derived a variety of tissues that were finemapped ( $PIP_{\text{Cumulative}}$   
532 = 0.683). Further investigation is thus needed to refine this locus.

533

534 There were a number of other genes that trended towards surviving multiple-testing correction  
535 in spleen and the other two tissues – including, *PLD4* in spleen and *STPG1* in lung. We  
536 subjected genes that trended towards multiple testing correction (two orders of magnitude  
537 above the Bonferroni threshold) to gene-set overrepresentation analysis to identify gene  
538 ontologies enriched for these genes, with *immune system process* and *immune response*  
539 overrepresented after multiple-testing correction, supporting the biological relevance of this  
540 signal (Supplementary Table 12). For instance, downregulation of tumour necrosis factor  
541 receptor gene *TNFRSF19* in lung trended towards correlation with pneumonia,  $Z = -3.44$ ,  $P =$   
542  $5.78 \times 10^{-4}$ .

543

#### 544 **Pneumonia displays genetic correlation with clinically significant phenotypes**

545 We estimated genetic correlation between pneumonia and 180 GWAS using LDSR, with a  
546 significant non-zero estimate of genetic correlation obtained for twenty phenotypes after the  
547 application of multiple testing correction ( $P < 2.78 \times 10^{-4}$ , Supplementary Table 13, Fig. 2).  
548 Interestingly, the most significant genetic correlation was found between pneumonia and  
549 insomnia ( $r_g = 0.496$ ,  $SE = 0.075$ ,  $P = 3.55 \times 10^{-11}$ ), which supports previous observational data  
550 that insomnia and reduced sleep duration increased the risk of developing pneumonia<sup>48,49</sup>. In  
551 addition, we uncovered significant genetic correlation with other clinically interesting  
552 phenotypes including forced vital capacity ( $r_g = -0.215$ ,  $SE = 0.0361$ ,  $P = 2.62 \times 10^{-9}$ ), obesity  
553 ( $r_g = 0.3023$ ,  $SE = 0.0466$ ,  $P = 9.15 \times 10^{-11}$ ), and HDL cholesterol ( $r_g = -0.2876$ ,  $SE = 0.0664$ ,  
554  $P = 1.48 \times 10^{-5}$ ).

555

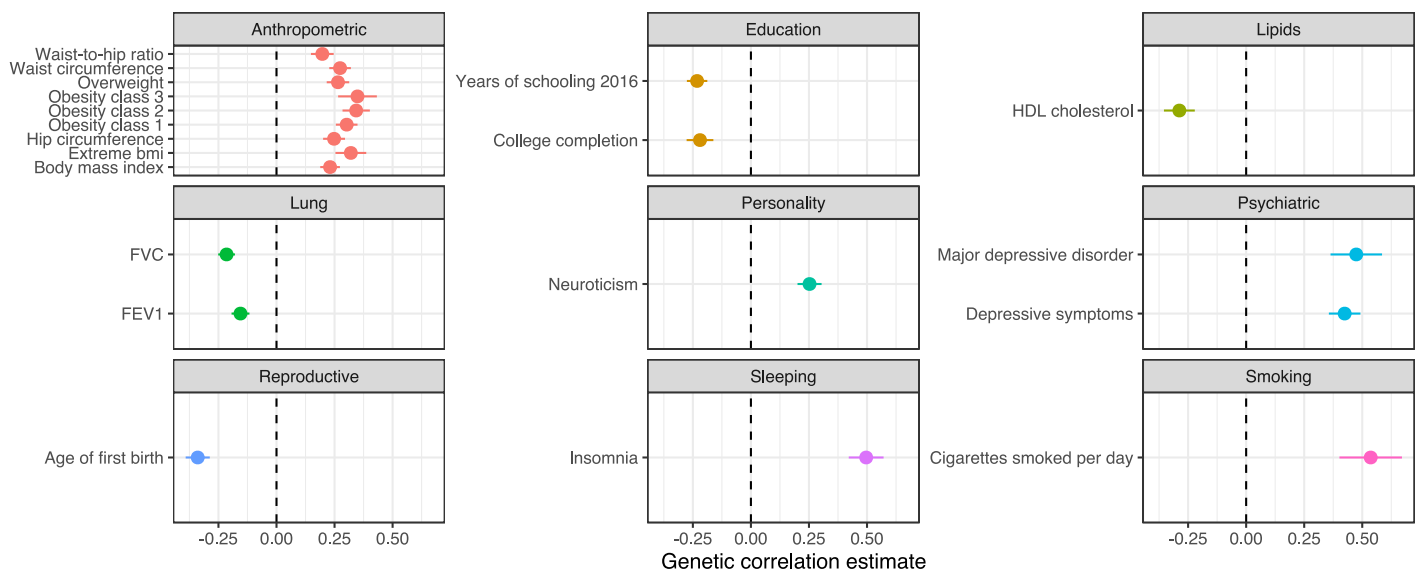

556

557 **Figure 2. Estimates of genetic correlation between pneumonia and a panel of**  
 558 **GWAS that survive multiple testing correction.** Each panel of the forest plot is the  
 559 estimate of genetic correlation by LD score regression (+/- its standard error, denoted  
 560 by the error bars). The dotted lines represent a genetic correlation of zero. Panels were  
 561 grouped by the phenotypic category of the trait subjected to LDSR.

562

563

564 A latent causal variable (LCV) model was then constructed for the most significantly  
 565 correlated trait-pairs from each phenotypic category that comprised the 180 GWAS tested for  
 566 genetic correlation. The LCV approach leverages the bivariate effect size distribution of  
 567 SNPs in two GWAS and their LD scores to estimate a genetic causality proportion (GCP),  
 568 such that, evidence of partial genetic causality can be distinguished from genetic correlation.  
 569 We found strong evidence ( $|\widehat{GCP}| > 0.6$ ) for partial genetic causality of cigarettes per day and  
 570 HDL on pneumonia. Both posterior mean GCP estimates were significantly different from  
 571 zero, however, the estimate of HDL  $\rightarrow$  pneumonia ( $\widehat{GCP} = 0.758, SE = 0.159, P = 2.20 \times 10^{-11}$ )  
 572 was more precise than that of cigarettes per day  $\rightarrow$  pneumonia ( $\widehat{GCP} = 0.713, SE = 0.225,$   
 573  $P = 3.51 \times 10^{-3}$ ). The magnitude of the potential causal relationship between HDL and  
 574 pneumonia was further investigated using mendelian randomisation (MR). Given the  
 575 biological overlap between the genetic architecture of HDL and other lipid classes, we  
 576 constructed a multivariable MR model that conditioned HDL instrumental variables on their  
 577 association with LDL cholesterol and triglycerides, obtaining the SNP-exposure estimates

578 from the Willer *et al.* global lipids genetics consortium paper , as has been outlined elsewhere  
579 <sup>29,50</sup>. There was no evidence of a causal effect of HDL ( $P = 0.65$ ) or LDL ( $P = 0.47$ )  
580 conditioned on the remaining lipid classes, although there was nominal evidence of a risk  
581 increasing effect of triglycerides on pneumonia –  $\beta = 0.058$ ,  $SE = 0.028$ ,  $P = 0.035$ . These  
582 data highlight the complexities of distinguishing between confounding pleiotropy and  
583 evidence for causal relationships, with further work needed to resolve whether the  
584 directionally disproportionate variant effect sizes for HDL  $\rightarrow$  pneumonia captured by the  
585 LCV model represent a true evidence for a causal relationship or whether other factors like  
586 triglycerides may explain this relationship. In addition, the effect of other confounders like  
587 BMI on these relationships cannot also be ruled out, although BMI did not show evidence of  
588 a causal effect in the LCV model.

589

### 590 **Opportunities for drug repurposing by leveraging the genetic architecture of pneumonia**

591 We sought to interrogate the pneumonia GWAS to propose novel drug repurposing candidates  
592 that could be useful to treat patients diagnosed with pneumonia more effectively. Firstly, we  
593 utilised a very liberal approach which identified genes that were targeted by approved drugs  
594 outside the MHC region physically mapped to loci associated with pneumonia at a minimum  
595 of a suggestive significance threshold ( $P < 1 \times 10^{-5}$ ). There were five such genes that displayed  
596 a high confidence interaction with an approved pharmacological agent with a known  
597 mechanism of action – *IL6R*, *SCNNIA*, *ATP2B1*, *ERBB2*, and *STAT5B*). For instance,  
598 Tocilizumab is a monoclonal antibody that targets *IL6R* which has been suggested as a  
599 repurposing opportunity to use for severe illness following SARS-CoV2 infection, although  
600 results from randomised controlled trials have been mixed in terms of efficacy<sup>51</sup>. We examined  
601 these genes in the TWAS analyses, however, only *IL6R* was significantly *cis*-heritable in one  
602 of the three tissues we utilised. Interestingly, there was a trend towards a correlation between  
603 downregulation of *IL6R* and increased odds of pneumonia, which would not support the use of  
604 anti-IL-6 receptor agents like tocilizumab –  $Z = -3.148$ ,  $P = 1.64 \times 10^{-3}$ . In contrast, the lead  
605 SNP and odds increasing allele of the *IL6R* locus in this GWAS has been associated with  
606 increased *IL6R* levels in a protein quantitative trait loci study (pQTL), which would support  
607 the efficacy of tocilizumab. We caution that the pQTL signal is in high LD with a missense  
608 variant (rs2228145), and thus, antigen binding affinity may be altered to create an artefactual  
609 pQTL association. These antigen-binding affinity related effects require further investigation,  
610 particularly in light of the phenomenon of the non-synonymous rs2228415 C allele displaying  
611 correlation with increased protein abundance from the pQTL study<sup>52</sup> but with decreased

612 expression via RNAseq derived eQTL estimates from whole blood by GTEx, along with  
613 decreased CRP levels in the UK biobank, a well-characterised biomarker of IL-6 receptor (IL-  
614 6R) inhibition. Previous functional analyses of the rs2228145 non-synonymous allele have  
615 demonstrated that it likely impairs IL6 signalling, with increased expression of soluble  
616 circulating IL-6R but downregulation of the membrane bound isoform<sup>53</sup>. As a result, we  
617 conclude that based on the genetic association alone that the anti-inflammatory effect of IL-6R  
618 blockade may have a risk-increasing impact on pneumonia, although further work is required  
619 to evaluate tocilizumab as a potential repurposing opportunity, particularly as its efficacy  
620 would likely be dependent on its temporal application in the clinical course of the disease.

621

622 A panel of 50 metabolites and blood cell count phenotypes from the UK biobank (UKBB) with  
623 moderate to high confidence SNP-based heritability estimates were then tested for genetic  
624 correlation with pneumonia (Supplementary Table 14). The concept underlying this is that if  
625 there is evidence of a relationship between a biochemical trait and pneumonia, then a drug  
626 which modulates that trait in a risk-decreasing direction could be clinically useful, and thus,  
627 repurposed for pneumonia. We found 13 biochemical traits from the UKBB panel that were  
628 correlated with pneumonia after multiple-testing correction (Supplementary Table 15). The  
629 most significant correlation was a positive genetic correlation with triglycerides, followed by  
630 a positive correlation with glycaeted haemoglobin (HbA1c), which is interesting given  
631 previous evidence that hyperglycaemia has a deleterious effect on lung function<sup>27,54</sup>. The  
632 correlation between HbA1c and pneumonia may not be necessarily driven by glycaemic  
633 biology, particularly as HbA1c is strongly influenced by haematological factors, although we  
634 did observe weak evidence for a positive correlation between glucose and pneumonia that does  
635 not survive multiple testing correction ( $P = 0.01$ , Supplementary Table 15). It should be noted  
636 that this UKBB sample is a larger sample size than the triglyceride GWAS subjected to LDSR  
637 in the broad LDhub GWAS panel from earlier in the manuscript, and thus, the estimate is more  
638 significant in this analysis. In addition, the HDL GWAS from the UKBB was not included due  
639 to anomalous estimates of large standard error when considering its heritability estimate  
640 (Supplementary Methods). There was only very weak evidence from the LCV model for a  
641 potential causal influence of triglycerides on pneumonia ( $\widehat{GCP} = 0.465$ ,  $SE = 0.226$ ,  $P = 0.052$ ,  
642 Figure 3a), although this broadly supports the results of the lipid multivariable MR described  
643 earlier in the manuscript that provided nominal evidence of a deleterious impact of increased  
644 triglycerides. We attempted to replicate the earlier multivariable MR results using the LDL,

645 HDL, and triglyceride GWAS from the UK biobank as the exposure traits rather than the Willer  
646 *et al.* global lipids genetics consortium GWAS, with an analogous result that demonstrated an  
647 odds-increasing effect of triglycerides but a non-significant effect of LDL or HDL cholesterol  
648 (Supplementary Table 16). We followed this up by estimating a univariable estimate of  
649 triglycerides → pneumonia, with a 5.4% mean increase in the odds of pneumonia per standard  
650 deviation increase in triglycerides across the five MR methods utilised (Supplementary  
651 Methods, Supplementary Table 17). The causal estimate was only statistically significant in  
652 the case of the two IVW estimators: OR = 1.056 [95% CI: 1.01, 1.104],  $P = 0.017$  (IVW  
653 multiplicative random effects), however, the remaining models had relatively consistent point  
654 estimates of the effect of triglycerides on pneumonia (Figure 3b). There was some nominal  
655 evidence of heterogeneity amongst IV exposure-outcome estimates ( $Q = 212.51$ ,  $df = 168$ ,  $P =$   
656  $0.01$ ), however, the Egger intercept was not significantly different from  $-$  thus, we observed  
657 no direct statistical evidence of confounding pleiotropy. As a result, these data suggest a  
658 potential repurposing opportunity for drugs prescribed for hypertriglyceridemia, such as statins  
659 and fibrates, with the caveat that the MR and LCV models from this study provide only  
660 relatively weak to moderate support, particularly as the mean posterior GCP estimate was low,  
661 and thus, genetic correlation could contaminate the MR estimate.

662  
663 The remaining LCV models for biochemical traits genetically correlated with pneumonia did  
664 not indicate any strong evidence of partial genetic causality, with the exception of a putative  
665 effect of gamma-glutamyltransferase (GGT) on pneumonia that approximately reached the  
666 threshold for a strong point estimate of the GCP -  $\widehat{GCP} = 0.59$ ,  $SE = 0.212$ ,  $P = 1.08 \times 10^{-4}$ .  
667 GGT is an enzyme that is commonly characterised as a biomarker of liver dysfunction, with  
668 some evidence of an immunological role for this enzyme, as well as its involvement in alveolar  
669 gas exchange. We further investigated this putative causal relationship by leveraging 207  
670 independent SNPs associated with GGT ( $P < 5 \times 10^{-8}$ ) in the UK biobank as IVs – approximated  
671 variance explained by IVs = 6.47%,  $F$ -statistic = 114.91. The five MR models implemented in  
672 this study yielded a roughly similar effect size per SD increase in GGT that increased the odds  
673 of pneumonia (mean pneumonia OR per SD GGT increase = 1.055, Supplementary Table 18).  
674 However, the estimates were not statistically significant, with the exception of the weighted  
675 median model (OR = 1.087 [95% CI: 1.01, 1.17],  $P = 0.025$ ). There was evidence of  
676 heterogeneity amongst the IV exposure-outcome effects, which may be indicative of  
677 confounding pleiotropy ( $Q = 301.87$ ,  $df = 206$ ,  $P = 1.501 \times 10^{-5}$ ), although given the large

678 number of IVs observed heterogeneity is not a surprising phenomenon. Importantly, there was  
679 no statistical evidence of pleiotropy from the intercept of the MR egger model. We caution that  
680 statistical approaches to assess pleiotropy do not and cannot rule out a confounding influence  
681 on the MR estimate, and detailed biological annotation of the IVs would be warranted to  
682 investigate this further. In summary, there may be a causal relationship between GGT and  
683 increased odds of pneumonia which could support inhibition of this enzyme as a treatment  
684 target, with several GGT inhibitors under active development and explored for use in  
685 respiratory illness<sup>55,56</sup>.

686

687 Furthermore, we compared the MR estimate of the effect of a standard deviation increase in  
688 GGT and triglyceride concentration on the odds of pneumonia to an observational estimate  
689 from the UK biobank sample (Supplementary Methods). We found that the observational  
690 association between a standard deviation increase in triglyceride concentration and pneumonia  
691 was analogous to the univariable and multivariable MR estimates (OR = 1.059 [95% CI: 1.042,  
692 1.076],  $P = 2 \times 10^{-12}$ ), whilst the observed association between GGT and pneumonia was  
693 stronger than the MR estimate, with each standard deviation associated with a 13.54% [95%  
694 CI: 12.43%, 14.56%] increase in the odds of pneumonia amongst UK biobank participants.  
695 Interestingly, these associations were also consistent amongst individuals in the UK biobank  
696 with relatively lower risk of pneumonia, that is, non-smoking females aged 45 or younger at  
697 time of assessment – triglycerides: OR = 1.335 [95% CI: 1.13, 1.555],  $P = 2.67 \times 10^{-4}$ , GGT:  
698 OR = 1.354 [95% CI: 1.161, 1.553],  $P = 2.75 \times 10^{-5}$ . These variables are extremely  
699 heterogeneous and there are many potential confounders of the observed effect sizes, however,  
700 it supports the inferred relationship from the LCV and MR models.

701  
702 **a**  
703  
704  
705  
706  
707  
708  
709  
710  
711  
712 **b**

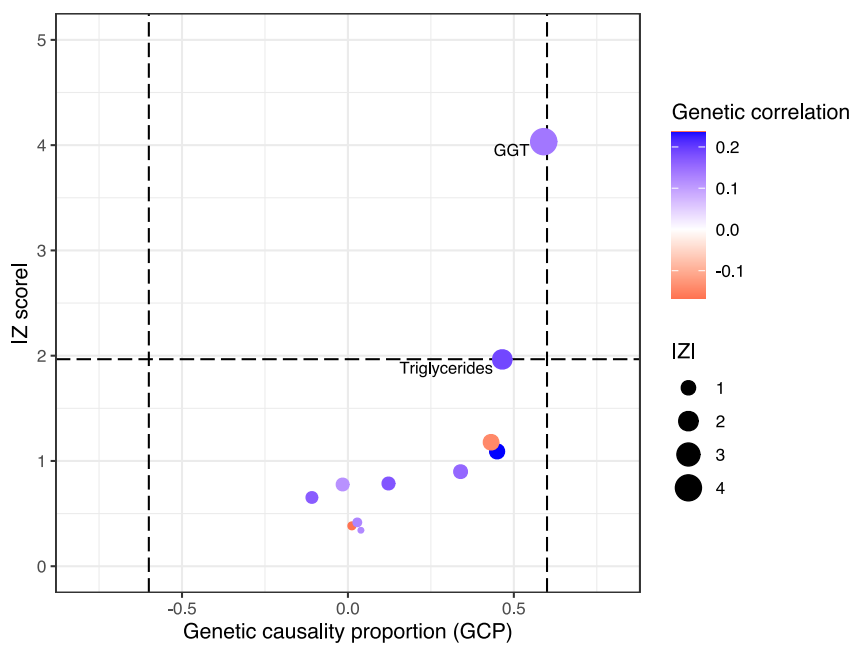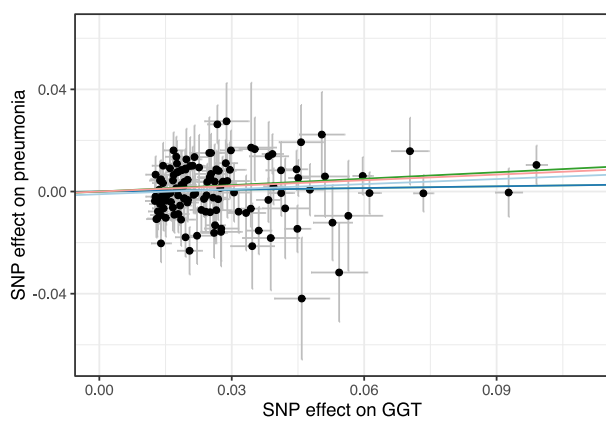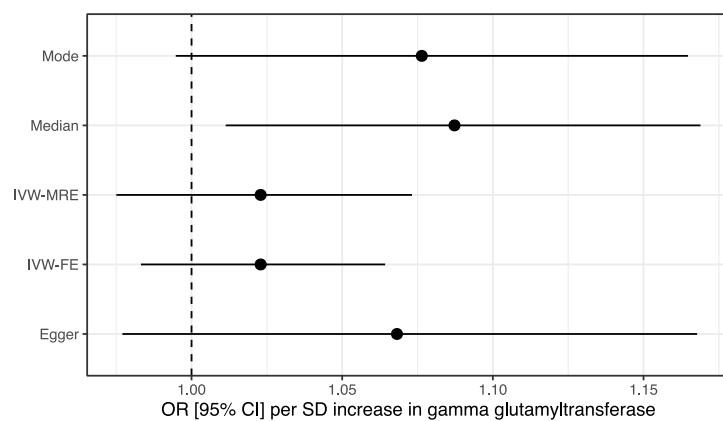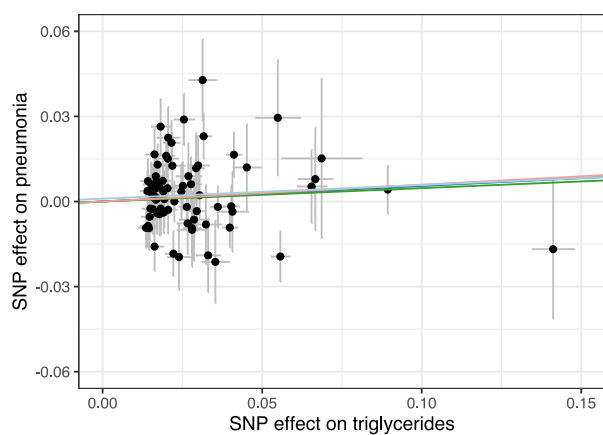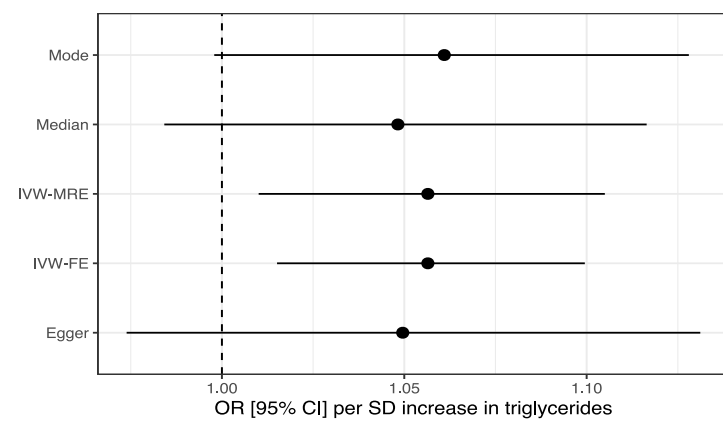

713  
714  
715  
716  
717

718 **Figure 3. Investigating the potential utility of modulating biochemical traits as**  
719 **drug repurposing opportunities for pneumonia. (a)** Latent causal variable models  
720 constructed between genetically correlated trait pairs after Bonferroni correction. Each  
721 point represents the genetic causality proportion, with the y axis denoting the precision  
722 of the GCP estimate, that is, its Z score. The genetic correlation estimate between the  
723 two traits was utilised to shade the points, with the larger points also indicative of a  
724 larger GCP Z score. A positive GCP estimate is indicative of partial genetic causality  
725 of the biochemical trait → pneumonia, whilst a negative estimate represents the  
726 converse. **(b)** A Mendelian randomisation (MR) analysis of the effect of genetically  
727 proxied gamma glutamyl-transferase (GGT) and triglycerides on the odds of  
728 pneumonia. The scatter plot visualises the effect of each instrumental variable SNP on  
729 GGT or triglycerides verses its effect on pneumonia, with the regression trend line the  
730 MR estimate from each of the five models implemented. Similarly, the forest plot  
731 indicates the pneumonia odds ratio for each of the MR models, with the error bar  
732 indicative of the 95% confidence intervals. The MR models were as follows: mode =  
733 weighted mode estimator, median = weighted median estimator, IVW-FE = inverse-  
734 variance weighted estimator with fixed effects, IVW-MRE = inverse-variance weighted  
735 estimator with multiplicative random effects, Egger = MR-Egger regression.

736  
737

### 738 **Precision drug repurposing to treat pneumonia**

739

740 We implemented the *pharmagenic enrichment score* (PES) approach to identify drug  
741 repurposing candidates that could be targeted more precisely based on genetic risk<sup>27,37</sup>. Briefly,  
742 the PES is a genetic risk score specifically within a biological pathway that is targeted by  
743 approved drugs. The concept underlying the PES is that individuals with elevated genetic risk  
744 within a particular druggable set of genes may benefit from a pharmacological agent that  
745 modulates the pathway in question. Firstly, we identified five druggable pathways that  
746 displayed an enrichment of the common variant genetic architecture of pneumonia at one of  
747 four *P*-value thresholds for the inclusion of variants in the model (FDR < 0.05, Table 2,  
748 Supplementary Table 19, Supplementary Methods). These included two complement-related  
749 pathways, *p53 signalling*, and *bile acid metabolism*.

750



751 **Table 2. Candidate druggable gene-sets that could be utilised to calculate *pharmagenic***  
 752 ***enrichment scores***

| PES gene-set                           | $P_T^1$ | $P$                   | Example drug/nutraceutical |
|----------------------------------------|---------|-----------------------|----------------------------|
| P53 signalling pathway                 | 0.05    | $2.13 \times 10^{-8}$ | Fostamatinib               |
| Lectin induced complement pathway      | 0.05    | $2.98 \times 10^{-8}$ | Human immunoglobulin       |
| Complement pathway                     | 0.05    | $6.81 \times 10^{-8}$ | Zinc                       |
| Bile acid metabolism                   | 0.005   | $1 \times 10^{-6}$    | Atorvastatin               |
| RIG-I-like receptor signalling pathway | 0.005   | $1.58 \times 10^{-5}$ | Etanercept                 |

753 <sup>1</sup> $P_T = P$  value threshold for variant inclusion in the model

754

755 There were a number of diverse compounds that targeted these pathways, with compounds  
 756 identified as repurposing candidates through testing whether there was a statistically significant  
 757 overrepresentation of their targets in the gene-set, along with high confidence single drug-gene  
 758 interactions (Supplementary Tables 20,21). For instance, targets of the micronutrient zinc were  
 759 overrepresented amongst genes in the *Complement pathway* gene-set, supporting previous  
 760 evidence that zinc can modulate complement activation<sup>57,58</sup>.

761

762 *Characteristics of pneumonia pharmagenic enrichment scores*

763

764 We investigated the properties of these five scores in the UKBB cohort. Interestingly, there  
 765 were no large correlations (all  $r < 0.07$ ) between the PES and a genome-wide polygenic risk  
 766 score for pneumonia, which supports our hypothesis that pathway-based risk scores may  
 767 provide novel biological insights that are not encompassed by PRS constructed from variants  
 768 throughout the genome. Both the genome wide PRS and the PES profiles were not significantly  
 769 associated with pneumonia diagnosis (self-reported/clinically ascertained or clinically  
 770 ascertained only, Supplementary Tables 22,23, Supplementary Methods). This is perhaps not  
 771 surprising given the low SNP heritability of pneumonia and the heterogeneity of the phenotype  
 772 – however, we believe this does not preclude the relevance of PES at an individual level. For  
 773 instance, given the putative relationship between hypertriglyceridemia and increased odds of  
 774 pneumonia, as supported by this study, we tested the relationship between the pneumonia *Bile*  
 775 *acid metabolism* PES and measured triglycerides in the UKBB. There was a small but  
 776 significant positive correlation between the PES and triglyceride concentration –  $\beta = 0.01$ ,  $SE$   
 777  $= 0.002$ ,  $P = 1.69 \times 10^{-4}$ , which was significant even after adjusting for statin use or using  
 778 triglyceride values as the outcome variable winsorized at three standard deviations above the

779 mean to guard against an excessive influence of outliers ( $\beta = 0.01$ ,  $SE = 0.002$ ,  $P = 1.43 \times 10^{-}$   
780  $^4$ ). This relationship with triglycerides was not seen using genome wide PRS ( $\beta = 1.57 \times 10^{-4}$ ,  
781  $SE = 0.002$ ,  $P = 0.93$ ).

782

783 *Associations between pneumonia pharmagenic enrichment scores and host susceptibility to*  
784 *infection*

785

786 The relationship between PES, as a function of host genetic susceptibility to pneumonia, and  
787 antibody response to infection was then assessed in a subset of the UKBB with these data  
788 available and passing our genotyping QC thresholds (N = 6443). We implemented these  
789 analyses given the host-immune response is directly relevant to pneumonia and if the PES  
790 displays distinct correlations with antibody response compared to genome-wide pneumonia  
791 PRS, it would emphasise the potential biological utility of the PES framework. Firstly, we  
792 tested the association between each PES and antibody response to 28 antigens amongst  
793 individuals with detectable levels of antibodies for 14 infections (seroreactivity, Fig. 4c,  
794 Supplementary Table 24). The strongest relationship between a PES profile and seroreactivity  
795 was a positive correlation between the *Complement pathway* PES and IgG response to the  
796 major capsid protein VP1 of the BK polyomavirus, with each SD increase in the PES associated  
797 with a 0.05 (0.01) SD increase in antibody response,  $P = 4.1 \times 10^{-4}$ , which trended towards  
798 surviving multiple testing correction ( $q = 0.07$ ). There was no association between genome  
799 wide PRS and IgG mediated response to this antigen. There were other nominally significant  
800 correlations observed (Fig. 4a), with most of these correlations positive and potentially  
801 indicative of an increased immune response. In addition, susceptibility to infection  
802 (seropositivity) was also investigated (Supplementary Table 25). For instance, a nominal  
803 association uncovered between *RIG-I-like receptor signalling pathway* and decreased odds of  
804 herpes simplex virus-1 infection (OR = 0.93 per SD in score [95% CI: 0.87, 0.98],  $P = 4 \times 10^{-}$   
805  $^3$ ), whilst *Complement pathway* PES was nominally associated with increased odds of positive  
806 *H. pylori* serostatus - OR = 1.07 per SD in score [95% CI: 1.01, 1.12],  $P = 0.02$ .

807

808

809

810

811

812

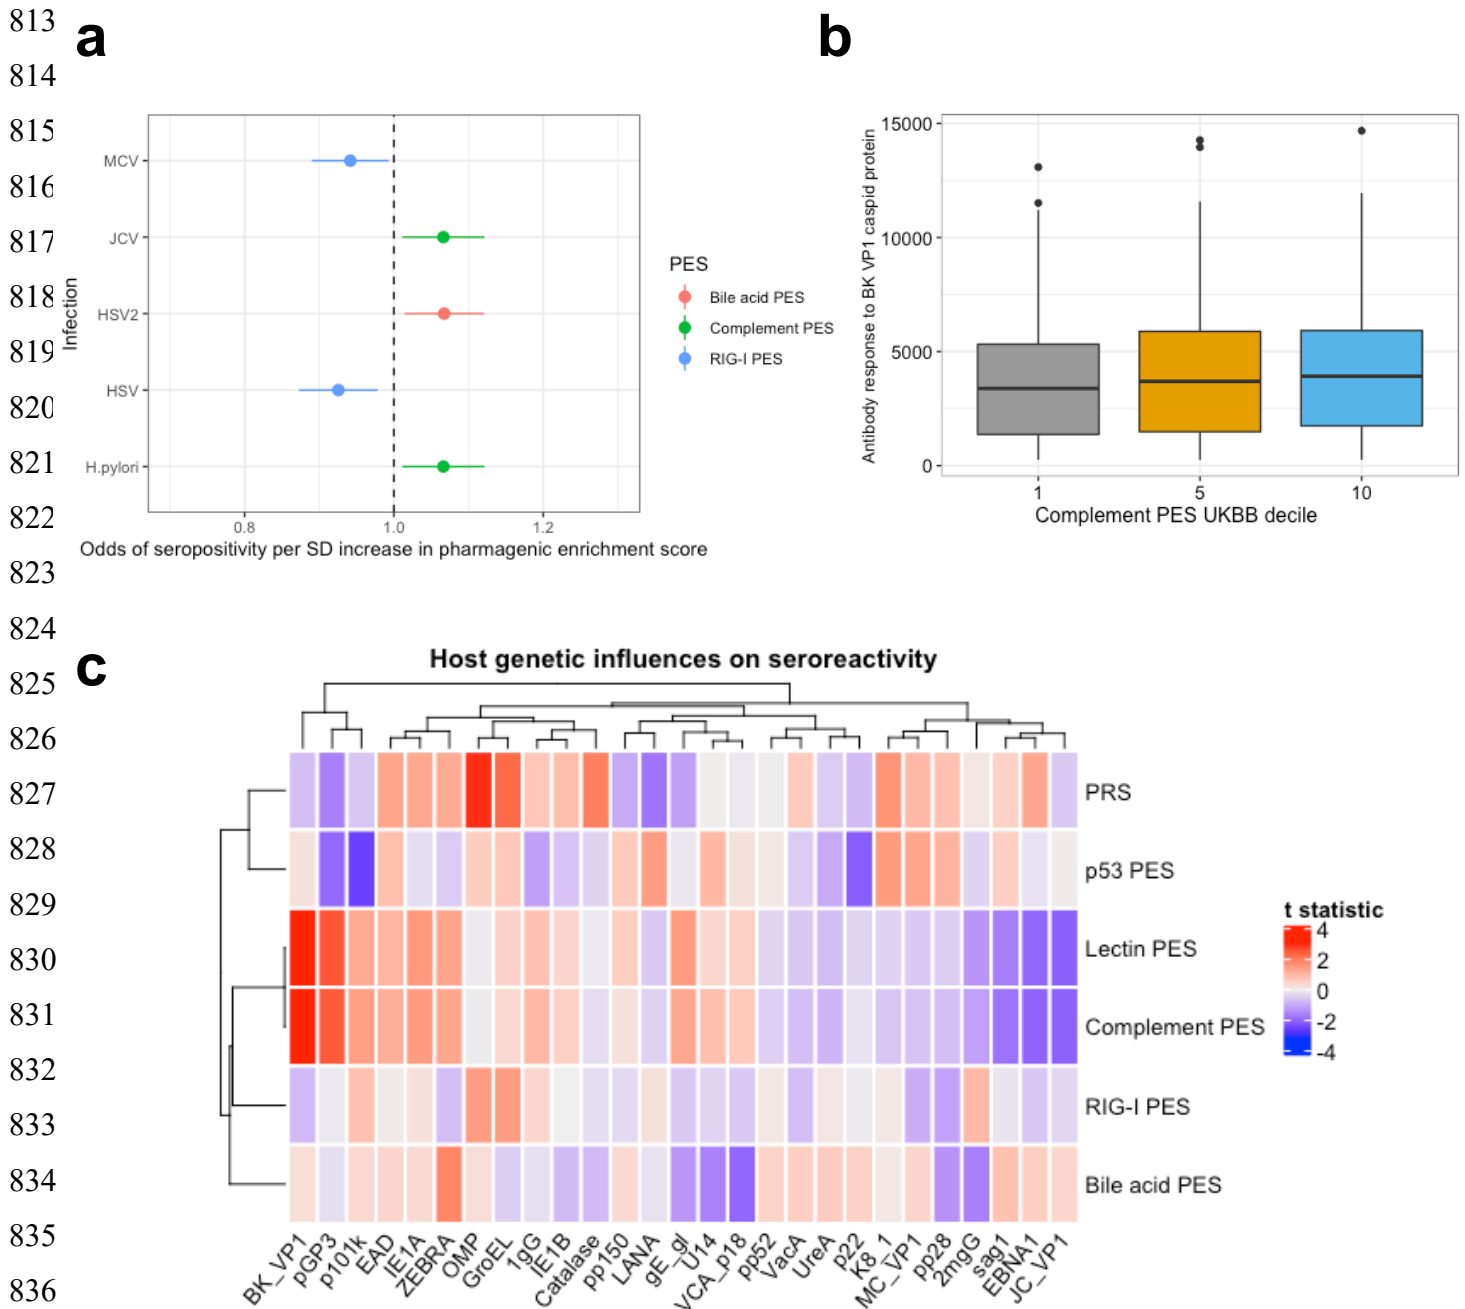

**Figure 4. The relationship between host genetics pneumonia pathway based pharmagenic enrichment scores and antibody response.** (a) Nominally significant associations between pneumonia PES and seropositivity as a binary variable. The forest plot denotes the odds ratio of each infection serostatus (error bars represent 95% confidence intervals) per SD increase in the PES tested. The infections abbreviated are as follows: MCV = Merkel Cell Polyomavirus, JCV = Human Polyomavirus JCV, HSV = herpes simplex virus 1, HSV2 = herpes simplex virus 2, *H. pylori* = Helicobacter pylori. (b) IgG response (mean fluorescence intensity) to the major capsid protein VP1

847 of the BK polyomavirus in the 10<sup>th</sup> percentile (1<sup>st</sup> decile, denoted 1), 50<sup>th</sup> percentile (5<sup>th</sup>  
848 decile, denoted 5), and 90<sup>th</sup> percentile (10<sup>th</sup> decile, denoted 10) of the complement  
849 pathway PES amongst the genotyped subset of the UKBB subjected to antibody  
850 screening included in our analyses. (c) Heatmap of the regression *t* statistic  
851 (beta/standard error) for the correlation between each PES and PRS with respective IgG  
852 response to antigens amongst individuals seropositive for that infection. Hierarchical  
853 clustering was applied to the rows and columns using Pearson's correlation distance.

854

## 855 DISCUSSION

856 In this study, we uncovered the first significant association signals for lifetime pneumonia  
857 susceptibility outside of the MHC region. Interestingly, there was also a novel low frequency  
858 variant in the MHC itself which reached genome-wide significant that confers a relatively large  
859 (~ 59%) increase in the odds of pneumonia, reflecting the immense heterogeneity spanned  
860 within this region. Further analyses of the MHC signal are warranted, particularly to  
861 deconvolve specific HLA types that may contribute to pneumonia susceptibility and  
862 progression. Each of the loci beyond the MHC identified this study were relatively complex,  
863 although we were able to derive a 95% credible set for the most significant non-MHC locus on  
864 chromosome 11 that implicated the mucin gene *MUC5AC*. It should be noted that our fine-  
865 mapping approach is relatively biologically naïve as it assumes a single causal variant, and  
866 thus, the involvement of other genes remains unclear. *MUC5AC* is an interesting candidate  
867 given that it has been previously implicated in the pathogenesis of respiratory illness and the  
868 role of mucins in physical defence against pathogens via mucociliary clearance<sup>59</sup>. This heavily  
869 glycosylated protein is lowly expressed in normal respiratory epithelium, however, is  
870 upregulated upon in response to perturbagens, such as viral infection<sup>60,61</sup>. We posit that  
871 upregulation of *MUC5AC* may be deleterious in the context of pneumonia given recent  
872 evidence that this protein can enhance airway inflammation induced by viral infection<sup>62</sup>,  
873 although dissection of the mechanisms of variants in this locus are warranted, particularly given  
874 the apparent discordant relationship of this signal we observed on the odds on asthma.  
875 Interestingly, there are some preliminary data that suggests *MUC5AC* is upregulated in the  
876 airway mucus of patients with severe COVID-19, although these studies were conducted using  
877 small sample sizes<sup>63,64</sup>. There was also evidence of a more expansive polygenic signal amongst  
878 mucin and beta-galactoside/N-acetylgalactosaminide genes in the *termination of O-glycan*  
879 *biosynthesis pathway*, whereby sialic acid residues conjugated to mucins can terminate O-  
880 glycan biosynthesis<sup>65</sup>. Interestingly, therapies specifically targeting mucin-linked O-

881 glycosylation are now under active development, including a recently proposed hexamine  
882 analog that demonstrated potent inhibition of O-glycan biosynthesis and downregulation of  
883 neutrophil infiltration in rodents<sup>66</sup>.

884

885 Drug repurposing is an attractive downstream application for GWAS, and we demonstrate its  
886 potential utility for pneumonia through three distinct methods. Causal inference between  
887 biochemical traits and pneumonia may provide repositioning opportunities along with a greater  
888 understanding of pathological mechanisms in the disorder. For instance, we reveal evidence to  
889 suggest a potential protective effect of HDL cholesterol and a deleterious impact of elevated  
890 triglycerides on the odds of pneumonia. These data support observational data that lower  
891 baseline HDL and elevated triglycerides have risk-increasing properties for pneumonia<sup>67-69</sup>, .  
892 We emphasise that our data only provided weak to moderate support for a causal influence of  
893 lipid abundance on pneumonia, and replicated, well-powered randomised controlled trials are  
894 needed to definitively assess the suitability of lipid-modifying agents like statins. A key  
895 limitation of proposing drug repurposing candidates for the phenotype as a singular entity is  
896 that it ignores the inherent heterogeneity of pneumonia onset and clinical course. It has been  
897 shown previously that individual genes supported by GWAS significantly increase the  
898 likelihood of a candidate drug being successfully approved from the phase I stage<sup>70</sup>, however,  
899 the relevance of more expansive association signals relating to biological networks for  
900 precision medicine remains unclear. As a result, we sought to implement an approach which  
901 seeks to target drug repositioning opportunities to those with elevated genetic risk within  
902 pathways relevant to the compound (PES, one of the prioritised pathways for the construction  
903 of a PES was the *Bile acid metabolism* gene-set, further supporting the relevance of compounds  
904 that modulate cholesterol. In the UKBB cohort, we demonstrated that these scores were distinct  
905 from genome-wide PRS, and thus, may offer biological insights that were missed by using a  
906 genome-wide score. For example, the *Bile acid metabolism* PES was positively correlated with  
907 triglyceride levels, whilst this was not observed for PRS. We caution that one cannot draw a  
908 causal inference from this relationship. In addition, the putative relationship between PES and  
909 IgG response to antigens is biologically relevant both in terms of increased and decreased  
910 antibody response. One can conceptualise the phenotype of pneumonia as having a contribution  
911 from increased likelihood of infection, but also an aberrant inflammatory response once  
912 infected with a pathogen. The distinct signal observed with these IgG phenotypes for the  
913 pathway-based PES compared to genome-wide PRS, therefore, further highlights the potential  
914 utility of the PES framework. Further work is required to evaluate the suitability of compounds

915 that modulate the PES pathways of interest and to categorise drug repurposing candidates based  
916 on their suitability for prevention and/or treatment of pneumonia. The key advantage of the  
917 PES framework is that only individuals with relevant genetic background in a pathway of  
918 interest would be prioritised for the respective repurposing candidate, which would be useful  
919 given the polygenic nature of complex disorders. Detailed discussion of the strengths and  
920 limitations of the PES methodology have been featured in previous publications<sup>27,37</sup>.

921

922 There are a number of important limitations that should be considered in light of the pneumonia  
923 GWAS itself and our drug repurposing analyses. Firstly, this GWAS was conducted using  
924 samples from European ancestry as large, diverse, genotyped cohorts with pneumonia status  
925 information are not yet available. It will be critical to translate findings related to host-genetic  
926 influences on pneumonia that future efforts strive to collect trans-ancestral data, particularly  
927 due to concerns about the portability of European GWAS signals and the advantages in  
928 finemapping afforded by including multiple ancestries<sup>71</sup>. The SNP heritability for pneumonia  
929 derived in this study was also relatively low, and it remains unclear how heterogeneity amongst  
930 the phenotype definition of pneumonia may contribute to this. In other words, given that  
931 pneumonia is caused by a variety of factors and may go undiagnosed in some individuals,  
932 detailed phenotyping data would potentially assist in resolving the genetic architecture of this  
933 disorder. For example, a GWAS on susceptibility verses pneumonia severity will likely reveal  
934 different biological insights. This could also be aided by stratified analyses by age, given  
935 pneumonia is more pervasive in the elderly. The putative drug repurposing candidates  
936 suggested in this study must also be viewed in light of the low heritability of pneumonia and  
937 need for clinical validation. Despite these challenges, we believe that further resolving the host-  
938 genetic architecture of pneumonia will be invaluable to public health efforts to more effectively  
939 prevent and manage the illness. In summary, we revealed novel genome-wide significant loci  
940 associated with life-time pneumonia susceptibility beyond the MHC region. These data  
941 provided some support for the potential utility of triglycerides and GGT as treatment targets  
942 for pneumonia, however, randomised controlled trials are now required to establish the efficacy  
943 of such interventions. Moreover, the *pharmagenic enrichment score* approach may provide a  
944 precision medicine-based intervention for drug repurposing for pneumonia prophylaxis and  
945 treatment given an individual's composition of genetic risk. The properties of these scores and  
946 the prospects of integrating them with other clinical metrics warrants further research.

947

948

949 **DECLARATION OF INTERESTS**

950 W.R.R and M.J.C have filed a patent related to the use of the pharmagenic enrichment score  
951 framework in complex disorders, the remaining authors declare no competing financial  
952 interests.

953

954 **ACKNOWLEDGEMENTS**

955 We wish to acknowledge the participants and investigators of FinnGen study and the 23andMe  
956 Inc. study from which these data were derived for the GWAS meta-analysis. In addition, his  
957 research has been conducted using the UK Biobank Resource under the application 58432.  
958 This study was supported by an NHMRC project grant (1147644). M.J.C. is supported by an  
959 NHMRC Senior Research Fellowship (1121474).

960

961 **CONSORTIA**

962

963 **The 23andMe Research Team**

964 Michelle Agee<sup>3</sup>, Babak Alipanahi<sup>3</sup>, Robert K. Bell<sup>3</sup>, Katarzyna Bryc<sup>3</sup>, Sarah L. Elson<sup>3</sup>, Pierre  
965 Fontanillas<sup>3</sup>, Nicholas A. Furlotte<sup>3</sup>, Barry Hicks<sup>3</sup>, David A. Hinds<sup>3</sup>, Karen E. Huber<sup>3</sup>, Ethan M.  
966 Jewett<sup>3</sup>, Yunxuan Jiang<sup>3</sup>, Aaron Kleinman<sup>3</sup>, Keng-Han Lin<sup>3</sup>, Nadia K. Litterman<sup>3</sup>, Jennifer C.  
967 McCreight<sup>3</sup>, Matthew H. McIntyre<sup>3</sup>, Kimberly F. McManus<sup>3</sup>, Joanna L. Mountain<sup>3</sup>, Elizabeth  
968 S. Noblin<sup>3</sup>, Carrie A. M Northover<sup>3</sup>, Steven J. Pitts<sup>3</sup>, G. David Poznik<sup>3</sup>, J. Fah  
969 Sathirapongsasuti<sup>3</sup>, Janie F. Shelton<sup>3</sup>, Suyash Shringarpure<sup>3</sup>, Chao Tian<sup>3</sup>, Joyce Y. Tung<sup>3</sup>,  
970 Vladimir Vacic<sup>3</sup>, Xin Wang<sup>3</sup> & Catherine H. Wilson<sup>3</sup>.

971

972 **AUTHOR INFORMATION**

973

974 **School of Biomedical Sciences and Pharmacy, Faculty of Health and Medicine, The**  
975 **University of Newcastle, Callaghan, NSW, 2308, Australia**

976 William R. Reay, Michael P. Geaghan, and Murray J. Cairns

977

978 **Hunter Medical Research Institute, Newcastle, NSW, 2305, Australia**

979 William R. Reay, Michael P. Geaghan, and Murray J. Cairns

980

981 **23andMe Inc., Sunnyvale, CA, 94086, United States of America**

982 The 23andMe Research Team

983 **WEB RESOURCES**

984 DGIdb v4.2.0 - <https://www.dgidb.org/>

985 FAVOR - <http://favor.genohub.org/>

986 FOCUS version July 24 2019 - <https://github.com/bogdanlab/focus>

987 FUMA v1.3.6 - <https://fuma.ctglab.nl/>

988 FUSION version May 29 2020 - [https://github.com/gusevlab/fusion\\_twass](https://github.com/gusevlab/fusion_twass)

989 LCV version March 15 2019 - <https://github.com/lukejoconnor/LCV>

990 LDSR v1.0.1 - <https://github.com/bulik/ldsc>

991 MAGMA v.1.07b - <https://ctg.cncr.nl/software/magma>

992 METAL version March 2011 - [https://genome.sph.umich.edu/wiki/METAL\\_Quick\\_Start](https://genome.sph.umich.edu/wiki/METAL_Quick_Start)

993 MR-PRESSO v1 - <https://github.com/rondolab/MR-PRESSO/commits/master>

994 mtCOJO (GCTA version 1.93.2 beta mac) -

995 <https://cnsgenomics.com/software/gcta/#mtCOJO>

996 PLINK2 v.2.00a3LM - <https://www.cog-genomics.org/plink/2.0/>

997 PRSice-2 v.2.3.3 (linux) - <https://www.prsice.info/>

998 TwoSampleMR v.0.5.5 - <https://github.com/MRCIEU/TwoSampleMR>

999 VEP GRCh37 release 101 August 2020 -

1000 [https://grch37.ensembl.org/Homo\\_sapiens/Tools/VEP?db=core](https://grch37.ensembl.org/Homo_sapiens/Tools/VEP?db=core)

1001 WebGestaltR v.4.0.2 - <https://github.com/bzhanglab/WebGestaltR>

1002

1003

1004 **DATA AND CODE AVAILABILITY**

1005 All data in this study are publicly available, summary statistics from 23andMe Inc. can be  
1006 obtained upon application to the company. As per 23andMe data sharing policies, we are  
1007 only able to release 10,000 SNPs from our meta-analysis, which we have made available on  
1008 GitHub

1009 ([https://github.com/Williamreay/Pneumonia\\_meta\\_GWAS\\_drug\\_repurposing/tree/master/Summary\\_statistics](https://github.com/Williamreay/Pneumonia_meta_GWAS_drug_repurposing/tree/master/Summary_statistics)). The full GWAS summary statistics for the 23andMe discovery data set

1010 will be made available through 23andMe to qualified researchers under an agreement with  
1011 23andMe that protects the privacy of the 23andMe participants.

1012 Researchers wishing to recapitulate our meta-analysis can apply for access for the 23andMe  
1013 subset of the study (<https://research.23andme.com/dataset-access/>), and then meta-analyse  
1014 with FinnGen release 3 summary statistics as described in our manuscript. Code utilised in  
1015



1016 this study is available also on GitHub -

1017 [https://github.com/Williamreay/Pneumonia\\_meta\\_GWAS\\_drug\\_repurposing](https://github.com/Williamreay/Pneumonia_meta_GWAS_drug_repurposing).

1018

1019

## 1020 REFERENCES

1021 1. Mackenzie, G. (2016). The definition and classification of pneumonia. *Pneumonia*  
1022 (Nathan) 8, 14.

1023 2. Restrepo, M.I., Faverio, P., and Anzueto, A. (2013). Long-term prognosis in community-  
1024 acquired pneumonia. *Curr Opin Infect Dis* 26, 151–158.

1025 3. McAllister, D.A., Liu, L., Shi, T., Chu, Y., Reed, C., Burrows, J., Adelaye, D., Rudan, I.,  
1026 Black, R.E., Campbell, H., et al. (2019). Global, regional, and national estimates of  
1027 pneumonia morbidity and mortality in children younger than 5 years between 2000 and 2015:  
1028 a systematic analysis. *Lancet Glob Health* 7, e47–e57.

1029 4. Obel, N., Christensen, K., Petersen, I., Sørensen, T.I.A., and Skytthe, A. (2010). Genetic  
1030 and Environmental Influences on Risk of Death due to Infections Assessed in Danish Twins,  
1031 1943–2001. *American Journal of Epidemiology* 171, 1007–1013.

1032 5. Tian, C., Hromatka, B.S., Kiefer, A.K., Eriksson, N., Noble, S.M., Tung, J.Y., and Hinds,  
1033 D.A. (2017). Genome-wide association and HLA region fine-mapping studies identify  
1034 susceptibility loci for multiple common infections. *Nat Commun* 8, 599.

1035 6. Willer, C.J., Li, Y., and Abecasis, G.R. (2010). METAL: fast and efficient meta-analysis  
1036 of genomewide association scans. *Bioinformatics* 26, 2190–2191.

1037 7. Watanabe, K., Taskesen, E., van Bochoven, A., and Posthuma, D. (2017). Functional  
1038 mapping and annotation of genetic associations with FUMA. *Nat Commun* 8, 1826.

1039 8. Zhu, Z., Zheng, Z., Zhang, F., Wu, Y., Trzaskowski, M., Maier, R., Robinson, M.R.,  
1040 McGrath, J.J., Visscher, P.M., Wray, N.R., et al. (2018). Causal associations between risk  
1041 factors and common diseases inferred from GWAS summary data. *Nat Commun* 9, 224.

1042 9. Liu, M., Jiang, Y., Wedow, R., Li, Y., Brazel, D.M., Chen, F., Datta, G., Davila-  
1043 Velderrain, J., McGuire, D., Tian, C., et al. (2019). Association studies of up to 1.2 million  
1044 individuals yield new insights into the genetic etiology of tobacco and alcohol use. *Nat Genet*  
1045 51, 237–244.

1046 10. Ferreira, M.A.R., Mathur, R., Vonk, J.M., Szwajda, A., Brumpton, B., Granell, R., Brew,  
1047 B.K., Ulleymar, V., Lu, Y., Jiang, Y., et al. (2019). Genetic Architectures of Childhood- and  
1048 Adult-Onset Asthma Are Partly Distinct. *Am J Hum Genet* 104, 665–684.

1049 11. Giambartolomei, C., Vukcevic, D., Schadt, E.E., Franke, L., Hingorani, A.D., Wallace,  
1050 C., and Plagnol, V. (2014). Bayesian test for colocalisation between pairs of genetic  
1051 association studies using summary statistics. *PLoS Genet.* 10, e1004383.

1052 12. Zhou, W., Nielsen, J.B., Fritsche, L.G., Dey, R., Gabrielsen, M.E., Wolford, B.N.,  
1053 LeFaive, J., VandeHaar, P., Gagliano, S.A., Gifford, A., et al. (2018). Efficiently controlling

- 1054 for case-control imbalance and sample relatedness in large-scale genetic association studies.  
1055 *Nat. Genet.* *50*, 1335–1341.
- 1056 13. Bulik-Sullivan, B., Finucane, H.K., Anttila, V., Gusev, A., Day, F.R., Loh, P.-R.,  
1057 ReproGen Consortium, Psychiatric Genomics Consortium, Genetic Consortium for Anorexia  
1058 Nervosa of the Wellcome Trust Case Control Consortium 3, Duncan, L., et al. (2015). An  
1059 atlas of genetic correlations across human diseases and traits. *Nat. Genet.* *47*, 1236–1241.
- 1060 14. Wellcome Trust Case Control Consortium, Maller, J.B., McVean, G., Byrnes, J.,  
1061 Vukcevic, D., Palin, K., Su, Z., Howson, J.M.M., Auton, A., Myers, S., et al. (2012).  
1062 Bayesian refinement of association signals for 14 loci in 3 common diseases. *Nat. Genet.* *44*,  
1063 1294–1301.
- 1064 15. Benner, C., Havulinna, A.S., Järvelin, M.-R., Salomaa, V., Ripatti, S., and Pirinen, M.  
1065 (2017). Prospects of Fine-Mapping Trait-Associated Genomic Regions by Using Summary  
1066 Statistics from Genome-wide Association Studies. *Am J Hum Genet* *101*, 539–551.
- 1067 16. de Leeuw, C.A., Mooij, J.M., Heskes, T., and Posthuma, D. (2015). MAGMA:  
1068 generalized gene-set analysis of GWAS data. *PLoS Comput. Biol.* *11*, e1004219.
- 1069 17. Liberzon, A., Birger, C., Thorvaldsdóttir, H., Ghandi, M., Mesirov, J.P., and Tamayo, P.  
1070 (2015). The Molecular Signatures Database (MSigDB) hallmark gene set collection. *Cell*  
1071 *Syst* *1*, 417–425.
- 1072 18. Liu, Y., and Xie, J. (2020). Cauchy Combination Test: A Powerful Test With Analytic  $p$  -  
1073 Value Calculation Under Arbitrary Dependency Structures. *Journal of the American*  
1074 *Statistical Association* *115*, 393–402.
- 1075 19. Liu, Y., Chen, S., Li, Z., Morrison, A.C., Boerwinkle, E., and Lin, X. (2019). ACAT: A  
1076 Fast and Powerful  $p$  Value Combination Method for Rare-Variant Analysis in Sequencing  
1077 Studies. *Am. J. Hum. Genet.* *104*, 410–421.
- 1078 20. Turkmen, A., and Lin, S. (2017). Are rare variants really independent? *Genet. Epidemiol.*  
1079 *41*, 363–371.
- 1080 21. Talluri, R., and Shete, S. (2013). A linkage disequilibrium-based approach to selecting  
1081 disease-associated rare variants. *PLoS ONE* *8*, e69226.
- 1082 22. Gusev, A., Ko, A., Shi, H., Bhatia, G., Chung, W., Penninx, B.W.J.H., Jansen, R., de  
1083 Geus, E.J.C., Boomsma, D.I., Wright, F.A., et al. (2016). Integrative approaches for large-  
1084 scale transcriptome-wide association studies. *Nat. Genet.* *48*, 245–252.
- 1085 23. Mancuso, N., Freund, M.K., Johnson, R., Shi, H., Kichaev, G., Gusev, A., and Pasaniuc,  
1086 B. (2019). Probabilistic fine-mapping of transcriptome-wide association studies. *Nat. Genet.*  
1087 *51*, 675–682.
- 1088 24. Zheng, J., Erzurumluoglu, A.M., Elsworth, B.L., Kemp, J.P., Howe, L., Haycock, P.C.,  
1089 Hemani, G., Tansey, K., Laurin, C., Early Genetics and Lifecourse Epidemiology (EAGLE)  
1090 Eczema Consortium, et al. (2017). LD Hub: a centralized database and web interface to  
1091 perform LD score regression that maximizes the potential of summary level GWAS data for  
1092 SNP heritability and genetic correlation analysis. *Bioinformatics* *33*, 272–279.

- 1093 25. O'Connor, L.J., and Price, A.L. (2018). Distinguishing genetic correlation from causation  
1094 across 52 diseases and complex traits. *Nat. Genet.* *50*, 1728–1734.
- 1095 26. Reay, W.R., Kiltschewskij, D.J., Geaghan, M.P., Atkins, J.R., Carr, V.J., Green, M.J., and  
1096 Cairns, M.J. (2021). Genetic estimates of correlation and causality between blood-based  
1097 biomarkers and psychiatric disorders (*Psychiatry and Clinical Psychology*).
- 1098 27. Reay, W.R., El Shair, S.I., Geaghan, M.P., Riveros, C., Holliday, E.G., McEvoy, M.A.,  
1099 Hancock, S., Peel, R., Scott, R.J., Attia, J.R., et al. (2021). Genetic association and causal  
1100 inference converge on hyperglycaemia as a modifiable factor to improve lung function. *ELife*  
1101 *10*, e63115.
- 1102 28. Hemani, G., Zheng, J., Elsworth, B., Wade, K.H., Haberland, V., Baird, D., Laurin, C.,  
1103 Burgess, S., Bowden, J., Langdon, R., et al. (2018). The MR-Base platform supports  
1104 systematic causal inference across the human phenome. *ELife* *7*, e34408.
- 1105 29. Willer, C.J., Schmidt, E.M., Sengupta, S., Peloso, G.M., Gustafsson, S., Kanoni, S.,  
1106 Ganna, A., Chen, J., Buchkovich, M.L., Mora, S., et al. (2013). Discovery and refinement of  
1107 loci associated with lipid levels. *Nat Genet* *45*, 1274–1283.
- 1108 30. Bowden, J., Davey Smith, G., Haycock, P.C., and Burgess, S. (2016). Consistent  
1109 Estimation in Mendelian Randomization with Some Invalid Instruments Using a Weighted  
1110 Median Estimator. *Genet. Epidemiol.* *40*, 304–314.
- 1111 31. Hartwig, F.P., Davey Smith, G., and Bowden, J. (2017). Robust inference in summary  
1112 data Mendelian randomization via the zero modal pleiotropy assumption. *Int J Epidemiol* *46*,  
1113 1985–1998.
- 1114 32. Bowden, J., Davey Smith, G., and Burgess, S. (2015). Mendelian randomization with  
1115 invalid instruments: effect estimation and bias detection through Egger regression. *Int J*  
1116 *Epidemiol* *44*, 512–525.
- 1117 33. Verbanck, M., Chen, C.-Y., Neale, B., and Do, R. (2018). Detection of widespread  
1118 horizontal pleiotropy in causal relationships inferred from Mendelian randomization between  
1119 complex traits and diseases. *Nat. Genet.* *50*, 693–698.
- 1120 34. Thompson, S.G., and Sharp, S.J. (1999). Explaining heterogeneity in meta-analysis: a  
1121 comparison of methods. *Stat Med* *18*, 2693–2708.
- 1122 35. Bowden, J., Del Greco M, F., Minelli, C., Davey Smith, G., Sheehan, N., and Thompson,  
1123 J. (2017). A framework for the investigation of pleiotropy in two-sample summary data  
1124 Mendelian randomization. *Stat Med* *36*, 1783–1802.
- 1125 36. Reay, W.R., Shair, S.E., Geaghan, M.P., Riveros, C., Holiday, E.G., McEvoy, M.A.,  
1126 Hancock, S., Peel, R., Scott, R.J., Attia, J.R., et al. (2020). Genetically informed precision  
1127 drug repurposing for lung function and implications for respiratory infection (*Respiratory*  
1128 *Medicine*).
- 1129 37. Reay, W.R., Atkins, J.R., Carr, V.J., Green, M.J., and Cairns, M.J. (2020).  
1130 Pharmacological enrichment of polygenic risk for precision medicine in complex disorders.  
1131 *Sci Rep* *10*, 879.

- 1132 38. Sudlow, C., Gallacher, J., Allen, N., Beral, V., Burton, P., Danesh, J., Downey, P., Elliott,  
1133 P., Green, J., Landray, M., et al. (2015). UK biobank: an open access resource for identifying  
1134 the causes of a wide range of complex diseases of middle and old age. *PLoS Med* *12*,  
1135 e1001779.
- 1136 39. Bycroft, C., Freeman, C., Petkova, D., Band, G., Elliott, L.T., Sharp, K., Motyer, A.,  
1137 Vukcevic, D., Delaneau, O., O'Connell, J., et al. (2018). The UK Biobank resource with deep  
1138 phenotyping and genomic data. *Nature* *562*, 203–209.
- 1139 40. Choi, S.W., and O'Reilly, P.F. (2019). PRSice-2: Polygenic Risk Score software for  
1140 biobank-scale data. *GigaScience* *8*, giz082.
- 1141 41. Mentzer, A.J., Brenner, N., Allen, N., Littlejohns, T.J., Chong, A.Y., Cortes, A., Almond,  
1142 R., Hill, M., Sheard, S., McVean, G., et al. (2019). Identification of host-pathogen-disease  
1143 relationships using a scalable Multiplex Serology platform in UK Biobank (Infectious  
1144 Diseases (except HIV/AIDS)).
- 1145 42. Gu, Z., Eils, R., and Schlesner, M. (2016). Complex heatmaps reveal patterns and  
1146 correlations in multidimensional genomic data. *Bioinformatics* *32*, 2847–2849.
- 1147 43. Linden, S.K., Sutton, P., Karlsson, N.G., Korolik, V., and McGuckin, M.A. (2008).  
1148 Mucins in the mucosal barrier to infection. *Mucosal Immunol* *1*, 183–197.
- 1149 44. Chen, H.-H., Shaw, D.M., Petty, L.E., Graff, M., Bohlender, R.J., Polikowsky, H.G.,  
1150 Zhong, X., Kim, D., Buchanan, V.L., Preuss, M.H., et al. (2021). Host genetic effects in  
1151 pneumonia. *The American Journal of Human Genetics* *108*, 194–201.
- 1152 45. Campos, A.I., Kho, P.F., Vazquez-Prada, K.X., García-Marín, L.M., Martin, N.G.,  
1153 Cuéllar-Partida, G., and Rentería, M.E. (2020). Genetic susceptibility to pneumonia: A  
1154 GWAS meta-analysis between UK Biobank and FinnGen (*Respiratory Medicine*).
- 1155 46. Kim, K., Park, S., Park, S.Y., Kim, G., Park, S.M., Cho, J.-W., Kim, D.H., Park, Y.M.,  
1156 Koh, Y.W., Kim, H.R., et al. (2020). Single-cell transcriptome analysis reveals TOX as a  
1157 promoting factor for T cell exhaustion and a predictor for anti-PD-1 responses in human  
1158 cancer. *Genome Med* *12*, 22.
- 1159 47. Sekine, T., Perez-Potti, A., Nguyen, S., Gorin, J.-B., Wu, V.H., Gostick, E., Llewellyn-  
1160 Lacey, S., Hammer, Q., Falck-Jones, S., Vangeti, S., et al. (2020). TOX is expressed by  
1161 exhausted and polyfunctional human effector memory CD8<sup>+</sup> T cells. *Sci. Immunol.* *5*,  
1162 eaba7918.
- 1163 48. Lin, C.-L., Liu, T.-C., Chung, C.-H., and Chien, W.-C. (2018). Risk of pneumonia in  
1164 patients with insomnia: A nationwide population-based retrospective cohort study. *J Infect*  
1165 *Public Health* *11*, 270–274.
- 1166 49. Patel, S.R., Malhotra, A., Gao, X., Hu, F.B., Neuman, M.I., and Fawzi, W.W. (2012). A  
1167 prospective study of sleep duration and pneumonia risk in women. *Sleep* *35*, 97–101.
- 1168 50. Burgess, S., and Thompson, S.G. (2015). Multivariable Mendelian randomization: the use  
1169 of pleiotropic genetic variants to estimate causal effects. *Am J Epidemiol* *181*, 251–260.

- 1170 51. Parr, J.B. (2020). Time to Reassess Tocilizumab’s Role in COVID-19 Pneumonia. *JAMA*  
1171 *Intern Med*.
- 1172 52. Folkersen, L., Fauman, E., Sabater-Lleal, M., Strawbridge, R.J., Frånberg, M., Sennblad,  
1173 B., Baldassarre, D., Veglia, F., Humphries, S.E., Rauramaa, R., et al. (2017). Mapping of 79  
1174 loci for 83 plasma protein biomarkers in cardiovascular disease. *PLoS Genet* *13*, e1006706.
- 1175 53. Ferreira, R.C., Freitag, D.F., Cutler, A.J., Howson, J.M.M., Rainbow, D.B., Smyth, D.J.,  
1176 Kaptoge, S., Clarke, P., Boreham, C., Coulson, R.M., et al. (2013). Functional IL6R 358Ala  
1177 allele impairs classical IL-6 receptor signaling and influences risk of diverse inflammatory  
1178 diseases. *PLoS Genet* *9*, e1003444.
- 1179 54. Davis, W.A., Knudman, M., Kendall, P., Grange, V., Davis, T.M.E., and Fremantle  
1180 Diabetes Study (2004). Glycemic exposure is associated with reduced pulmonary function in  
1181 type 2 diabetes: the Fremantle Diabetes Study. *Diabetes Care* *27*, 752–757.
- 1182 55. King, J.B., West, M.B., Cook, P.F., and Hanigan, M.H. (2009). A novel, species-specific  
1183 class of uncompetitive inhibitors of gamma-glutamyl transpeptidase. *J Biol Chem* *284*, 9059–  
1184 9065.
- 1185 56. Tuzova, M., Jean, J.-C., Hughey, R.P., Brown, L.A.S., Cruikshank, W.W., Hiratake, J.,  
1186 and Joyce-Brady, M. (2014). Inhibiting lung lining fluid glutathione metabolism with  
1187 GGsTop as a novel treatment for asthma. *Front Pharmacol* *5*, 179.
- 1188 57. Smailhodzic, D., van Asten, F., Blom, A.M., Mohlin, F.C., den Hollander, A.I., van de  
1189 Ven, J.P.H., van Huet, R.A.C., Groenewoud, J.M.M., Tian, Y., Berendschot, T.T.J.M., et al.  
1190 (2014). Zinc Supplementation Inhibits Complement Activation in Age-Related Macular  
1191 Degeneration. *PLoS ONE* *9*, e112682.
- 1192 58. Nan, R., Tetchner, S., Rodriguez, E., Pao, P.-J., Gor, J., Lengyel, I., and Perkins, S.J.  
1193 (2013). Zinc-induced self-association of complement C3b and Factor H: implications for  
1194 inflammation and age-related macular degeneration. *J Biol Chem* *288*, 19197–19210.
- 1195 59. Bustamante-Marin, X.M., and Ostrowski, L.E. (2017). Cilia and Mucociliary Clearance.  
1196 *Cold Spring Harb Perspect Biol* *9*,
- 1197 60. Hewson, C.A., Haas, J.J., Bartlett, N.W., Message, S.D., Laza-Stanca, V., Kebabdz, T.,  
1198 Caramori, G., Zhu, J., Edbrooke, M.R., Stanciu, L.A., et al. (2010). Rhinovirus induces  
1199 MUC5AC in a human infection model and in vitro via NF- $\kappa$ B and EGFR pathways. *Eur*  
1200 *Respir J* *36*, 1425–1435.
- 1201 61. Barbier, D., Garcia-Verdugo, I., Pothlichet, J., Khazen, R., Descamps, D., Rousseau, K.,  
1202 Thornton, D., Si-Tahar, M., Touqui, L., Chignard, M., et al. (2012). Influenza A induces the  
1203 major secreted airway mucin MUC5AC in a protease-EGFR-extracellular regulated kinase-  
1204 Sp1-dependent pathway. *Am J Respir Cell Mol Biol* *47*, 149–157.
- 1205 62. Singanayagam, A., Footitt, J., Kasdorf, B.T., Marczynski, M., Cross, M.T., Finney, L.J.,  
1206 Trujillo Torralbo, M.-B., Calderazzo, M., Zhu, J., Aniscenko, J., et al. (2019). MUC5AC  
1207 drives COPD exacerbation severity through amplification of virus-induced airway  
1208 inflammation (*Immunology*).

- 1209 63. Lu, W., Liu, X., Wang, T., Liu, F., Zhu, A., Lin, Y., Luo, J., Ye, F., He, J., Zhao, J., et al.  
1210 (2020). Elevated MUC1 and MUC5AC mucin protein levels in airway mucus of critical ill  
1211 COVID-19 patients. *J Med Virol*.
- 1212 64. He, J., Cai, S., Feng, H., Cai, B., Lin, L., Mai, Y., Fan, Y., Zhu, A., Huang, H., Shi, J., et  
1213 al. (2020). Single-cell analysis reveals bronchoalveolar epithelial dysfunction in COVID-19  
1214 patients. *Protein Cell* *11*, 680–687.
- 1215 65. (2009). *Essentials of Glycobiology* (Cold Spring Harbor (NY): Cold Spring Harbor  
1216 Laboratory Press).
- 1217 66. Wang, S.-S., del Solar, V., Yu, X., Antonopoulos, A., Friedman, A.E., Agarwal, K., Garg,  
1218 M., Ahmed, S.M., Addya, A., Nasirikenari, M., et al. (2020). Efficient Inhibition of O-glycan  
1219 biosynthesis using the hexosamine analog Ac<sub>5</sub> GalNTGc (*Biochemistry*).
- 1220 67. Bae, S.S., Chang, L.C., Merkin, S.S., Elashoff, D., Ishigami, J., Matsushita, K., and  
1221 Charles-Schoeman, C. (2020). Major Lipids and Future Risk of Pneumonia: 20-Year  
1222 Observation of the Atherosclerosis Risk in Communities (ARIC) Study Cohort. *The*  
1223 *American Journal of Medicine* S0002934320306987.
- 1224 68. Chien, Y.-F., Chen, C.-Y., Hsu, C.-L., Chen, K.-Y., and Yu, C.-J. (2015). Decreased  
1225 serum level of lipoprotein cholesterol is a poor prognostic factor for patients with severe  
1226 community-acquired pneumonia that required intensive care unit admission. *J Crit Care* *30*,  
1227 506–510.
- 1228 69. Antcliffe, D., Jiménez, B., Veselkov, K., Holmes, E., and Gordon, A.C. (2017).  
1229 Metabolic Profiling in Patients with Pneumonia on Intensive Care. *EBioMedicine* *18*, 244–  
1230 253.
- 1231 70. Nelson, M.R., Tipney, H., Painter, J.L., Shen, J., Nicoletti, P., Shen, Y., Floratos, A.,  
1232 Sham, P.C., Li, M.J., Wang, J., et al. (2015). The support of human genetic evidence for  
1233 approved drug indications. *Nat Genet* *47*, 856–860.
- 1234 71. Asimit, J.L., Hatzikotoulas, K., McCarthy, M., Morris, A.P., and Zeggini, E. (2016).  
1235 Trans-ethnic study design approaches for fine-mapping. *Eur J Hum Genet* *24*, 1330–1336.
- 1236
- 1237
- 1238
